# Supplementary material for: Induction of Isochromanones by Co-Cultivation of the Marine Fungus Cosmospora sp. and the Phytopathogen Magnaporthe oryzae
Source: MDPI journal article supplement (doi:10.3390/ijms23020782), 2022-01-11
Supplement: s1 [file s1]

# Induction of isochromanones by co-cultivation of the marine fungus *Cosmospora* sp. and the phytopathogen *Magnaporthe oryzae*

Ernest Oppong-Danquah <sup>1</sup>, Martina Blümel <sup>1</sup>, Silvia Scarpato <sup>2</sup>, Alfonso Mangoni <sup>2</sup> and Deniz Tasdemir <sup>1,3\*</sup>

<sup>1</sup> GEOMAR Centre for Marine Biotechnology (GEOMAR-Biotech), Research Unit Marine Natural Products Chemistry, GEOMAR Helmholtz Centre for Ocean Research Kiel, Am Kiel-Kanal 44, 24106 Kiel, Germany

<sup>2</sup> Dipartimento di Farmacia, Università degli Studi di Napoli Federico II, via Domenico Montesano 49, 80131 Napoli, Italy

<sup>3</sup> Faculty of Mathematics and Natural Science, Kiel University, Christian-Albrechts-Platz 4, 24118 Kiel, Germany

\* Correspondence: dtasdemir@geomar.de; Tel.: +49-431-6004430

## List of Tables

Page

**Table S1.** Putative annotation of metabolites produced in the axenic cultures of *Cosmospora* sp. and *M. oryzae*, and their co-culture

4

**Table S2.** In vitro anti-phytopathogenic activity (IC<sub>50</sub> values µg/mL) of the Kupchan subextracts *n*-hexane, CH<sub>2</sub>Cl<sub>2</sub> and aqueous MeOH (Aq.)

8

**Table S3.** Comparison of the <sup>1</sup>H NMR and <sup>13</sup>C NMR data of pseudoanguillosporin B (7) and soudanone E (2) with focus on the aliphatic side chain, (<sup>a</sup> acquired in CD<sub>3</sub>OD, <sup>b</sup> acquired in CDCl<sub>3</sub>, <sup>c</sup> data from literature (acquired in CD<sub>3</sub>OD), δ in ppm, J in Hz

9

## List of Figures

**Figure S1.** <sup>1</sup>H NMR spectrum of compound 1 (CDCl<sub>3</sub>, 600 MHz)

10

**Figure S2.** <sup>13</sup>C NMR spectrum of compound 1 (CDCl<sub>3</sub>, 150 MHz)

10

**Figure S3.** COSY spectrum of compound 1 (CDCl<sub>3</sub>, 600 MHz)

11

**Figure S4.** HSQC spectrum of compound 1 (CDCl<sub>3</sub>, 600/150 MHz)

11

**Figure S5.** HMBC spectrum of compound 1 (CDCl<sub>3</sub>, 600/150 MHz)

12

**Figure S6.** TOCSY spectrum of compound 1 (CDCl<sub>3</sub>, 600 MHz)

12

**Figure S7.** NOESY spectrum of compound 1 (CDCl<sub>3</sub>, 600 MHz)

13

**Figure S8.** <sup>1</sup>H NMR spectrum of compound 1 (CD<sub>3</sub>OD, 500 MHz)

13

**Figure S9.** HR-ESIMS spectrum of compound 1

14

**Figure S10.** HR-ESIMS/MS spectrum of compound 1

14

|                                                                                                   |    |
|---------------------------------------------------------------------------------------------------|----|
| <b>Figure S11.</b> FT-IR spectrum of compound <b>1</b>                                            | 14 |
| <b>Figure S12.</b> $^1\text{H}$ NMR spectrum of compound <b>2</b> ( $\text{CDCl}_3$ , 600 MHz)    | 15 |
| <b>Figure S13.</b> $^{13}\text{C}$ spectrum of compound <b>2</b> ( $\text{CDCl}_3$ , 150 MHz)     | 15 |
| <b>Figure S14.</b> COSY spectrum of compound <b>2</b> ( $\text{CDCl}_3$ , 600 M                   | 16 |
| <b>Figure S15.</b> HSQC spectrum of compound <b>2</b> ( $\text{CDCl}_3$ , 600/150 MHz             | 16 |
| <b>Figure S16.</b> HMBC spectrum of compound <b>2</b> ( $\text{CDCl}_3$ , 600/150 MHz)            | 17 |
| <b>Figure S17.</b> NOESY spectrum of compound <b>2</b> ( $\text{CDCl}_3$ , 600 MHz)               | 17 |
| <b>Figure S18.</b> HR-ESIMS spectrum of compound <b>2</b>                                         | 18 |
| <b>Figure S19.</b> HR-ESIMS/MS spectrum of compound <b>2</b>                                      | 18 |
| <b>Figure S20.</b> FT-IR spectrum of compound <b>2</b>                                            | 18 |
| <b>Figure S21.</b> $^1\text{H}$ NMR spectrum of compound <b>3</b> ( $\text{CDCl}_3$ , 600 MHz)    | 19 |
| <b>Figure S22.</b> $^{13}\text{C}$ NMR spectrum of compound <b>3</b> ( $\text{CDCl}_3$ , 150 MHz) | 19 |
| <b>Figure S23.</b> COSY spectrum of compound <b>3</b> ( $\text{CDCl}_3$ , 600 MHz)                | 20 |
| <b>Figure S24.</b> HSQC spectrum of compound <b>3</b> ( $\text{CDCl}_3$ , 600/150 MHz)            | 20 |
| <b>Figure S25.</b> HMBC spectrum of compound <b>3</b> ( $\text{CDCl}_3$ , 600/150 MHz)            | 21 |
| <b>Figure S26.</b> NOESY spectrum of compound <b>3</b> ( $\text{CDCl}_3$ , 600 MHz)               | 21 |
| <b>Figure S27.</b> HR-ESIMS spectrum of compound <b>3</b>                                         | 22 |
| <b>Figure S28.</b> HR-ESIMS/MS spectrum of compound <b>3</b>                                      | 22 |
| <b>Figure S29.</b> FT-IR spectrum of compound <b>3</b>                                            | 22 |
| <b>Figure S30.</b> $^1\text{H}$ NMR spectrum of compound <b>4</b> ( $\text{CDCl}_3$ , 600 MHz)    | 23 |
| <b>Figure S31.</b> $^{13}\text{C}$ NMR spectrum of compound <b>4</b> ( $\text{CDCl}_3$ , 150 MHz) | 23 |
| <b>Figure S32.</b> COSY spectrum of compound <b>4</b> ( $\text{CDCl}_3$ , 600 MHz)                | 24 |
| <b>Figure S33.</b> HSQC spectrum of compound <b>4</b> ( $\text{CDCl}_3$ , 600/150 MHz)            | 24 |
| <b>Figure S34.</b> HMBC spectrum of compound <b>4</b> ( $\text{CDCl}_3$ , 600/150 MHz)            | 25 |
| <b>Figure S35.</b> NOESY spectrum of compound <b>4</b> ( $\text{CDCl}_3$ , 600 MHz)               | 25 |
| <b>Figure S36.</b> HR-ESIMS spectrum of compound <b>4</b>                                         | 26 |
| <b>Figure S37.</b> HR-ESIMS/MS spectrum of compound <b>4</b>                                      | 26 |
| <b>Figure S38.</b> FT-IR spectrum of compound <b>4</b>                                            | 26 |
| <b>Figure S39.</b> $^1\text{H}$ NMR spectrum of compound <b>5</b> ( $\text{CDCl}_3$ , 600 MHz)    | 27 |
| <b>Figure S40.</b> $^{13}\text{C}$ NMR spectrum of compound <b>5</b> ( $\text{CDCl}_3$ , 150 MHz) | 27 |
| <b>Figure S41.</b> COSY spectrum of compound <b>5</b> ( $\text{CDCl}_3$ , 600 MHz)                | 28 |

|                                                                                                                                                                                                                                                                                                                                                  |    |
|--------------------------------------------------------------------------------------------------------------------------------------------------------------------------------------------------------------------------------------------------------------------------------------------------------------------------------------------------|----|
| <b>Figure S42.</b> HSQC spectrum of compound <b>5</b> (CDCl <sub>3</sub> , 600/150 MHz)                                                                                                                                                                                                                                                          | 28 |
| <b>Figure S43.</b> HMBC spectrum of compound <b>5</b> (CDCl <sub>3</sub> , 600/150 MHz)                                                                                                                                                                                                                                                          | 29 |
| <b>Figure S44.</b> NOESY spectrum of compound <b>5</b> (CDCl <sub>3</sub> , 600 MHz)                                                                                                                                                                                                                                                             | 29 |
| <b>Figure S45.</b> HR-ESIMS spectrum of compound <b>5</b>                                                                                                                                                                                                                                                                                        | 30 |
| <b>Figure S46.</b> HR-ESIMS/MS spectrum of compound <b>5</b>                                                                                                                                                                                                                                                                                     | 30 |
| <b>Figure S47.</b> FT-IR spectrum of compound <b>5</b>                                                                                                                                                                                                                                                                                           | 30 |
| <b>Figure S48.</b> Agar plate (9 cm Petri dish) of overlaid co-cultivation of <i>Cosmospora</i> sp. on <i>M. oryzae</i> after 21 days. UPLC chromatogram of the extract shows the expression of compounds <b>1-5</b> with <b>2-4</b> in very low intensity.                                                                                      | 31 |
| <b>Figure S49.</b> UPLC chromatograms of the extracts of co-cultures of <i>Cosmospora</i> sp. and <i>M. oryzae</i> in potato dextrose broth (PDB) at selected time points (Day 2, 3, 6, 9, 13, 14, 16 and 21). Extracted ion chromatogram (XIC) of compounds <b>8/9</b> , showing their biosynthesis from day 3 of co-cultivation in PDB medium. | 32 |
| <b>Figure S50.</b> Mosher's ester analysis scheme for compound <b>2</b>                                                                                                                                                                                                                                                                          | 33 |
| <b>Figure S51.</b> LC-MS chromatograms of the ( <i>R</i> )- and ( <i>S</i> )-MPA reaction mixtures from compound <b>2</b>                                                                                                                                                                                                                        | 34 |
| <b>Figure S52.</b> NMR analysis of the ( <i>R</i> )- and ( <i>S</i> )-MPA reaction mixtures from compound <b>2</b>                                                                                                                                                                                                                               | 34 |
| <b>Figure S53.</b> Mosher's ester analysis scheme for compound <b>4</b>                                                                                                                                                                                                                                                                          | 35 |
| <b>Figure S54.</b> LC-MS chromatograms of the ( <i>R</i> )-MPA reaction mixture from compound <b>4</b>                                                                                                                                                                                                                                           | 35 |
| <b>References</b>                                                                                                                                                                                                                                                                                                                                | 36 |

**Table S1.** Putative annotation of metabolites produced in the axenic cultures of *Cosmospora* sp. and *M. oryzae*, and their co-culture. Annotation/identification was based on the  $m/z$   $[M+H]^+$  or other adducts (specified), retention time ( $t_R$ ), predicted molecular formula, fragmentation pattern and spectral data analysis. The source of the compound is indicated as B - co-culture, R - *Cosmospora* sp. and G - *M. oryzae*. Confidence level of annotation are given based on the reporting standards (1- 4) proposed by Sumner, *et al.* [1] where 1 is identified compound - 4 is unknown compound.

| Ser. No. | Putative ID/ chemical family        | Structure                                                                           | Molecular formula ( $m/z$ )    | Parent mass $m/z$ $[M+H]^+$ | MS/MS fragmentation                                           | $t_R$ / source | Confidence / Reference |
|----------|-------------------------------------|-------------------------------------------------------------------------------------|--------------------------------|-----------------------------|---------------------------------------------------------------|----------------|------------------------|
| 1        | Soudanone A (isochromanone)         | 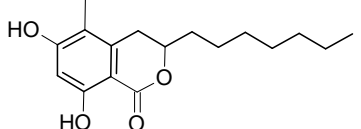   | $C_{17}H_{25}O_4$<br>$[M+H]^+$ | 293.1755                    | 275.1652; 265.1807; 191.0713;<br>137.0602                     | 8.77<br>B      | 1<br>[2]               |
| 2        | Soudanone E (isochromanone)         |    | $C_{17}H_{25}O_5$<br>$[M+H]^+$ | 309.1705                    | 273.1491; 255.1376; 191.0704;<br>137.0592                     | 5.91<br>B      | 1<br>[2]               |
| 3        | Soudanone D (isochromanone)         |    | $C_{17}H_{23}O_5$<br>$[M+H]^+$ | 307.1546                    | 289.1442; 271.1331; 229.1230;<br>179.0704                     | 6.17<br>B      | 1<br>[2]               |
| 4        | Soudanone H (isochromanone)         |   | $C_{17}H_{25}O_5$<br>$[M+H]^+$ | 309.1703                    | 273.1492; 255.1387; 203.0710;<br>181.0503; 163.0760; 137.0604 | 5.95<br>B      | 1                      |
| 5        | Soudanone I (isochromanone)         |  | $C_{16}H_{21}O_6$<br>$[M+H]^+$ | 309.1341                    | 277.1082; 231.1028; 215.1077;<br>203.1076; 137.0605           | 6.07<br>B      | 1                      |
| 6        | Pseudoanguillosporin A (isochroman) |  | $C_{17}H_{27}O_3$<br>$[M+H]^+$ | 279.1939                    | 260.1745; 151.0768                                            | 4.77<br>R/B    | 1<br>[3]               |

|    |                                                                                |                                                                                    |                                            |          |                                                               |              |          |
|----|--------------------------------------------------------------------------------|------------------------------------------------------------------------------------|--------------------------------------------|----------|---------------------------------------------------------------|--------------|----------|
| 7  | Pseudoanguillosporin B<br>(isochroman)                                         | 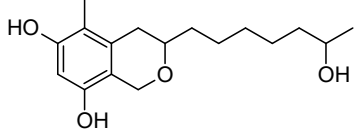  | $C_{17}H_{27}O_4$<br>[M+H] <sup>+</sup>    | 295.1912 | 277.1805; 259.1705; 151.0754                                  | 8.17<br>R/B  | 1<br>[3] |
| 8  | Cephalochromin<br>(naphtho- $\gamma$ -pyrone)                                  |   | $C_{28}H_{23}O_{10}$<br>[M+H] <sup>+</sup> | 519.1284 | 501.1195, 260.0698, 245.0457,<br>231.0683, 219.0297, 218.0229 | 7.46<br>R/B  | 1<br>[3] |
| 9  | Ustilaginoidin G/<br>Dihydroisoustilaginoidin A<br>(naphtho- $\gamma$ -pyrone) |   | $C_{28}H_{21}O_{10}$<br>[M+H] <sup>+</sup> | 517.1150 | 499.1036, 260.0694, 258.0541,<br>245.0427, 231.0701, 219.0291 | 7.31<br>R/B  | 1<br>[4] |
| 10 | Ergosterol<br>(steroid)                                                        |   | $C_{28}H_{44}ONa$<br>[M+Na] <sup>+</sup>   | 419.3290 | 300.8700; 253.2001; 159.12                                    | 10.96<br>R/B | 1<br>[5] |
| 11 | Ustilaginoidin A<br>(naphtho- $\gamma$ -pyrone)                                |  | $C_{28}H_{19}O_{10}$<br>[M+H] <sup>+</sup> | 515.1259 | 258.0501                                                      | 7.23<br>R/B  | 2<br>[4] |

|    |                                                      |                                                                                    |                                            |          |                                                                                                             |             |          |
|----|------------------------------------------------------|------------------------------------------------------------------------------------|--------------------------------------------|----------|-------------------------------------------------------------------------------------------------------------|-------------|----------|
| 12 | Ustilaginoidin H or I<br>(naphtho- $\gamma$ -pyrone) | 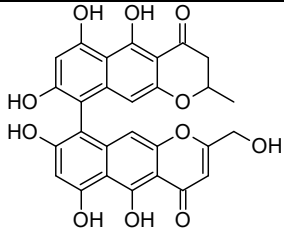  | $C_{28}H_{21}O_{11}$<br>[M+H] <sup>+</sup> | 533.1090 | 515.0963, 493.1126, 477.0819,<br>451.0999, 260.0693                                                         | 7.8<br>R/B  | 2<br>[4] |
| 13 | Ustilaginoidin V<br>(naphtho- $\gamma$ -pyrone)      |   | $C_{28}H_{23}O_{11}$<br>[M+H] <sup>+</sup> | 535.1237 | 517.1116, 493.1128, 477.0807,<br>451.1015, 260.0688, 517.1116,<br>493.1128, 477.0807, 451.1015,<br>260.0688 | 7.85<br>R/B | 2<br>[6] |
| 14 | Ustilaginoidin E<br>(naphtho- $\gamma$ -pyrone)      |   | $C_{29}H_{25}O_{10}$<br>[M+H] <sup>+</sup> | 533.1479 | 515.1333, 490.1250, 477.0801,<br>274.0849, 260.0694                                                         | 8.1<br>R/B  | 2<br>[4] |
| 15 | Ustilaginoidin D<br>(naphtho- $\gamma$ -pyrone)      |  | $C_{30}H_{27}O_{10}$<br>[M+H] <sup>+</sup> | 547.1599 | 529.1428, 504.1302, 491.1051,<br>274.0846, 201.0479                                                         | 8.25<br>R/B | 2<br>[4] |

|    |                                                 |                                                                                    |                                               |          |                                                                                                |             |          |
|----|-------------------------------------------------|------------------------------------------------------------------------------------|-----------------------------------------------|----------|------------------------------------------------------------------------------------------------|-------------|----------|
| 16 | Ustilaginoidin M<br>(naphtho- $\gamma$ -pyrone) | 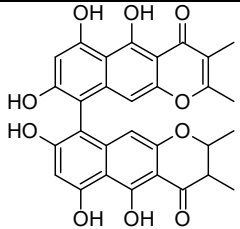  | $C_{30}H_{25}O_{10}$<br>[M+H] <sup>+</sup>    | 545.1447 | 464.2164, 424.1467, 272.0674                                                                   | 8.62<br>R/B | 2<br>[6] |
| 17 | Ustilaginoidin B<br>(naphtho- $\gamma$ -pyrone) |   | $C_{28}H_{20}O_{11}$<br>[M+H] <sup>+</sup>    | 531.1321 | 272.0701; 260.0700                                                                             | 8.1<br>R/B  | 2<br>[4] |
| 18 | Acuminatum C<br>(cyclic peptide)                |   | $C_{44}H_{72}N_7O_{11}$<br>[M+H] <sup>+</sup> | 874.5460 | 856.5190, 551.2844, 466.3281,<br>434.2038, 395.2917, 377.2818,<br>271.1421, 200.1040, 101.0707 | 8.14<br>R/B | 3<br>[7] |
| 19 | Acuminatum B<br>(cyclic peptide)                |  | $C_{45}H_{73}N_7O_{11}$<br>[M+H] <sup>+</sup> | 888.5449 | 870.5326, 565.2996, 466.3303,<br>434.2056, 395.2923, 271.1425                                  | 8.44<br>R/B | 3<br>[7] |

|    |                                                     |                                                                                   |                                                        |          |                              |             |          |
|----|-----------------------------------------------------|-----------------------------------------------------------------------------------|--------------------------------------------------------|----------|------------------------------|-------------|----------|
| 20 | Dehydroergosterol<br>(steroid)                      | 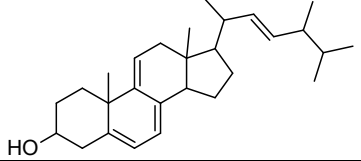 | $C_{28}H_{42}O$<br>[M-H <sub>2</sub> O+H] <sup>+</sup> | 377.3200 | 309.2600; 253.2001; 159.1202 | 10.9<br>R/B | 3<br>[8] |
| 21 | Phosphatidylcholine<br>(18:2/0:0)<br>(phospholipid) |  | $C_{26}H_{51}N_7OP$<br>[M+H] <sup>+</sup>              | 520.3740 | 184.0751                     | 7.7<br>G/B  | 3<br>[9] |

**Table S2.** In vitro anti-phytopathogenic activity (IC<sub>50</sub> values µg/mL) of the Kupchan subextracts *n*-hexane, CH<sub>2</sub>Cl<sub>2</sub> and aqueous MeOH. Test phytopathogens include Ps, *P. syringae*; Xc, *X. campestris*, Ea, *E. amylovora*; Rs, *R. solanacearum*; Pi, *P. infestans*; Mo, *M. oryzae*. DMSO (0.5%) was used as a solvent control. Positive controls for Xc, Ea and Ps: chloramphenicol, for Rs: tetracycline, for Mo: nystatin and for Pi: cycloheximide.

| Kupchan subextracts             | Ps    | Xc    | Ea    | Rs    | Pi    | Mo    |
|---------------------------------|-------|-------|-------|-------|-------|-------|
| Aq. MeOH                        | > 100 | > 100 | > 100 | > 100 | > 100 | > 100 |
| CH <sub>2</sub> Cl <sub>2</sub> | > 100 | 10.5  | > 100 | 99    | 8,5   | 3.9   |
| <i>n</i> -hexane                | > 100 | > 100 | > 100 | >100  | > 100 | > 100 |
| Positive control                | 0.7   | 0.5   | 0.7   | 1.0   | 0.3   | 0.4   |



**Table S3.** Comparison of the  $^1\text{H}$  NMR and  $^{13}\text{C}$  NMR data of pseudoanguillosporin B (**7**) and soudanone E (**2**) with focus on the aliphatic side chains, (<sup>a</sup> acquired in  $\text{CD}_3\text{OD}$ , <sup>b</sup> acquired in  $\text{CDCl}_3$ , <sup>c</sup> data obtained from literature [3] (acquired in  $\text{CD}_3\text{OD}$ ),  $\delta$  in ppm,  $J$  in Hz.

| Position    | $^1\text{H}$ NMR data |                       |                       | $^{13}\text{C}$ NMR data |                       |                       |
|-------------|-----------------------|-----------------------|-----------------------|--------------------------|-----------------------|-----------------------|
|             | <b>7</b> <sup>c</sup> | <b>7</b> <sup>a</sup> | <b>2</b> <sup>a</sup> | <b>7</b> <sup>c</sup>    | <b>7</b> <sup>b</sup> | <b>2</b> <sup>b</sup> |
| <b>1</b>    | 4.50 d (14.7)         | 4.49 d (14.7)         |                       | 64.6, $\text{CH}_2$      | 64.6, $\text{CH}_2$   | 170.6, C              |
|             | 4.84 d (14.7)         | 4.81 d (14.7)         |                       |                          |                       |                       |
| <b>2</b>    |                       |                       |                       |                          |                       |                       |
| <b>3</b>    | 3.51 m                | 3.55 m                | 4.48 m                | 74.9, CH                 | 74.7, CH              | 78.6, CH              |
| <b>4</b>    | 2.33 dd               | 2.35 dd               | 3.04 dd               | 32.3, $\text{CH}_2$      | 32.6, $\text{CH}_2$   | 30.7, $\text{CH}_2$   |
|             | (16.6, 10.8)          | (16.6, 10.7)          | (16.6, 3.4)           |                          |                       |                       |
|             | 2.59 dd               | 2.61 dd               | 2.69 dd               |                          |                       |                       |
|             | (16.6, 2.2)           | (16.6, 2.3)           | (16.6, 11.5)          |                          |                       |                       |
| <b>4a</b>   |                       |                       |                       | 133.4, C                 | 134.9, C              | 139.4, C              |
| <b>5</b>    |                       |                       |                       | 112.7, C                 | 113.7, C              | 113.2, C              |
| <b>6</b>    |                       |                       |                       | 153.5, C                 | 152.4, C              | 161.0, C              |
| <b>7</b>    | 6.21 s                | 6.19 s                | 6.24 s                | 99.6, CH                 | 100.4, CH             | 101.6, CH             |
| <b>8</b>    |                       |                       |                       | 150.8, C                 | 149.8, C              | 162.5, C              |
| <b>8a</b>   |                       |                       |                       | 112.8, C                 | 113.6, C              | 102.0, C              |
| <b>1'</b>   | 1.49 m                | 1.47 m                | 1.83 m                | 35.8, $\text{CH}_2$      | 36.2, $\text{CH}_2$   | 35.0, $\text{CH}_2$   |
|             |                       |                       | 1.76 m                |                          |                       |                       |
| <b>2'</b>   | 1.49 m                | 1.47 m                | 1.61 m                | 25.5, $\text{CH}_2$      | 25.8, $\text{CH}_2$   | 25.0, $\text{CH}_2$   |
|             |                       |                       | 1.46 m                |                          |                       |                       |
| <b>3'</b>   | 1.49 m                | 1.47 m                | 1.46                  | 29.5, $\text{CH}_2$      | 29.8, $\text{CH}_2$   | 29.4, $\text{CH}_2$   |
| <b>4'</b>   | 1.49 m                | 1.47 m                | 1.46 m                | 25.3, $\text{CH}_2$      | 25.7, $\text{CH}_2$   | 25.7, $\text{CH}_2$   |
|             |                       |                       | 1.39 m                |                          |                       |                       |
| <b>5'</b>   | 1.49 m                | 1.47 m                | 1.47 m                | 38.8, $\text{CH}_2$      | 39.4, $\text{CH}_2$   | 39.2, $\text{CH}_2$   |
|             |                       |                       | 1.38 m                |                          |                       |                       |
| <b>6'</b>   | 3.73 m                | 3.73 m                | 3.72 m                | 67.3, CH                 | 68.3, CH              | 68.4, CH              |
| <b>7'</b>   | 1.17 d (6.2)          | 1.16 d (6.3)          | 1.15 d (6.2)          | 22.2, $\text{CH}_3$      | 23.5, $\text{CH}_3$   | 23.7, $\text{CH}_3$   |
| <b>5-Me</b> | 1.98 s                | 1.98 s                | 2.04 s                | 9.0, $\text{CH}_3$       | 10.2, $\text{CH}_3$   | 10.6, $\text{CH}_3$   |

**Figure S1.**  $^1\text{H}$  NMR spectrum of compound **1** ( $\text{CDCl}_3$ , 600 MHz)

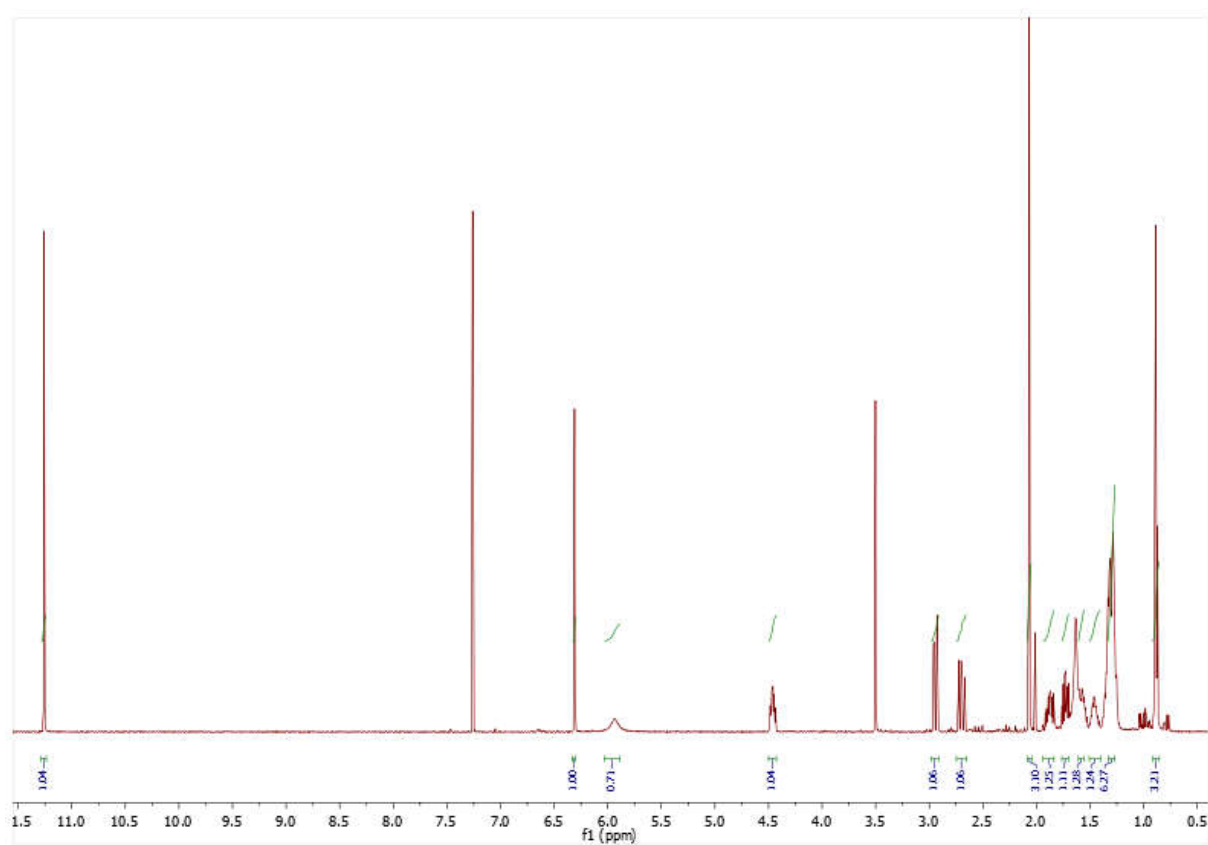

**Figure S2.**  $^{13}\text{C}$  NMR spectrum of compound **1** ( $\text{CDCl}_3$ , 150 MHz)

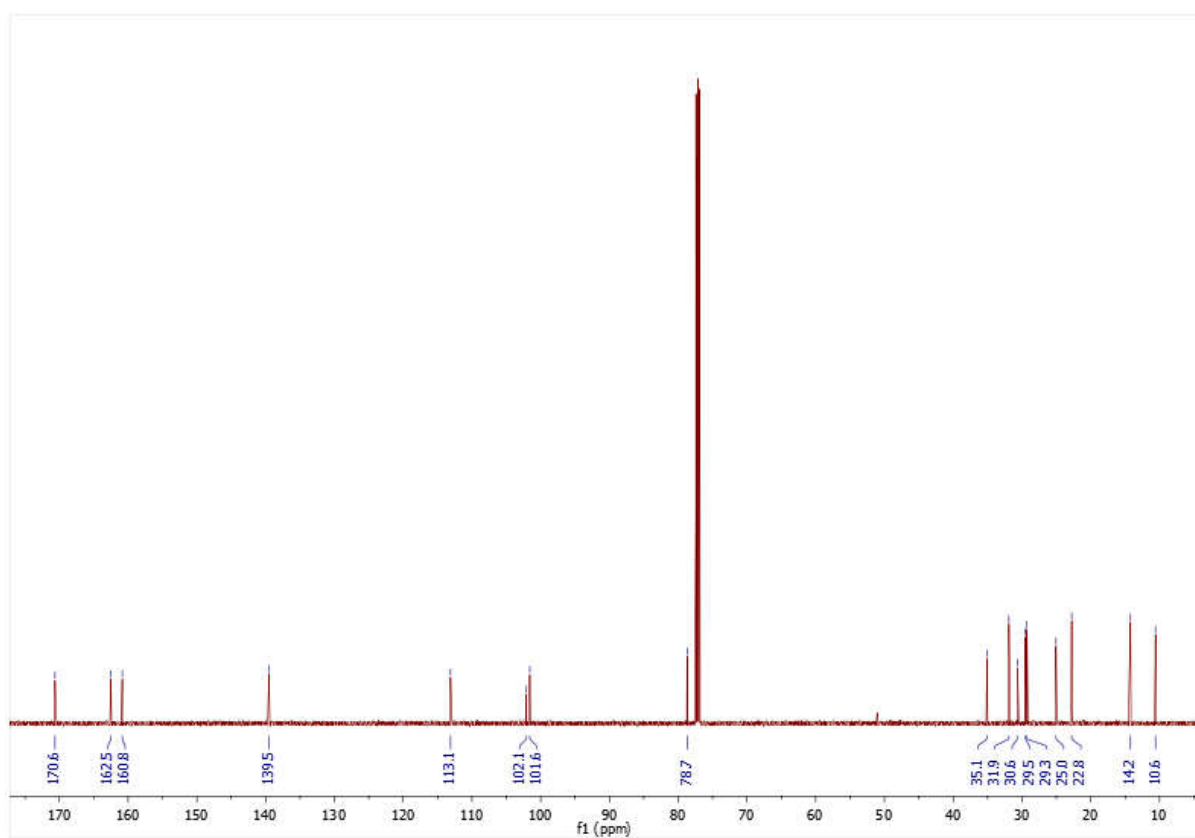

**Figure S3.** COSY spectrum of compound **1** (CDCl<sub>3</sub>, 600 MHz)

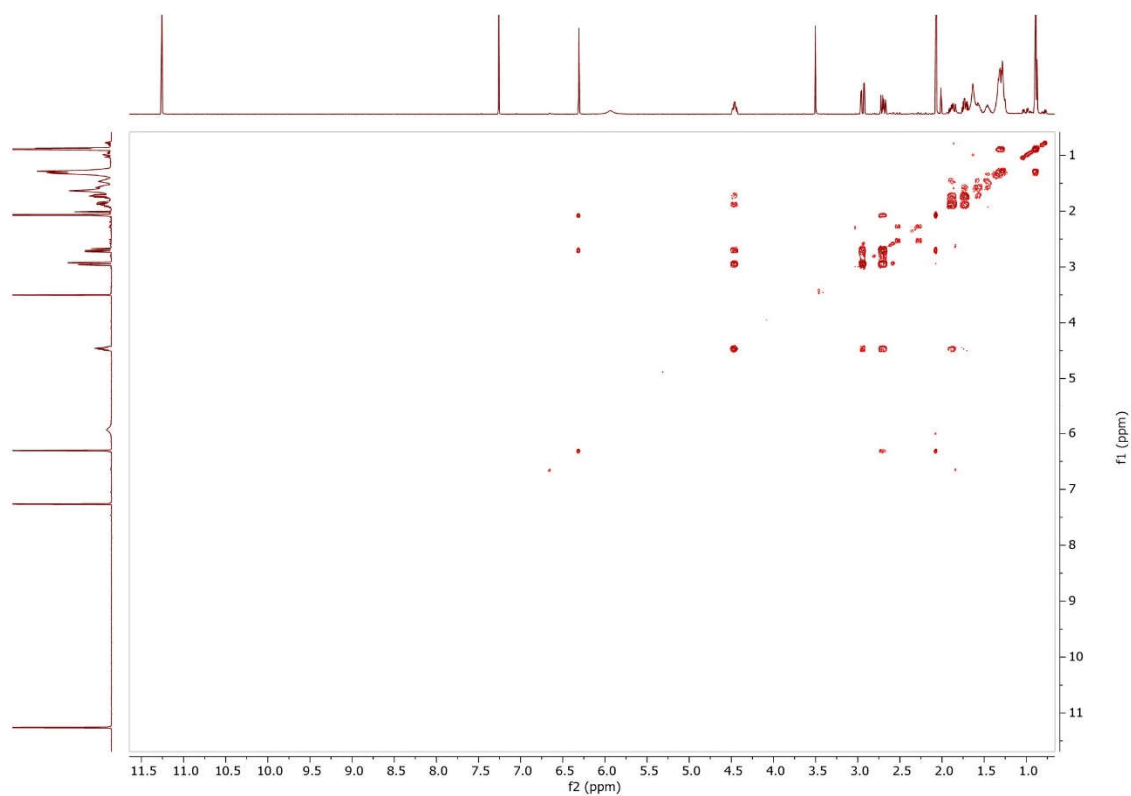

**Figure S4.** HSQC spectrum of compound **1** (CDCl<sub>3</sub>, 600/150 MHz)

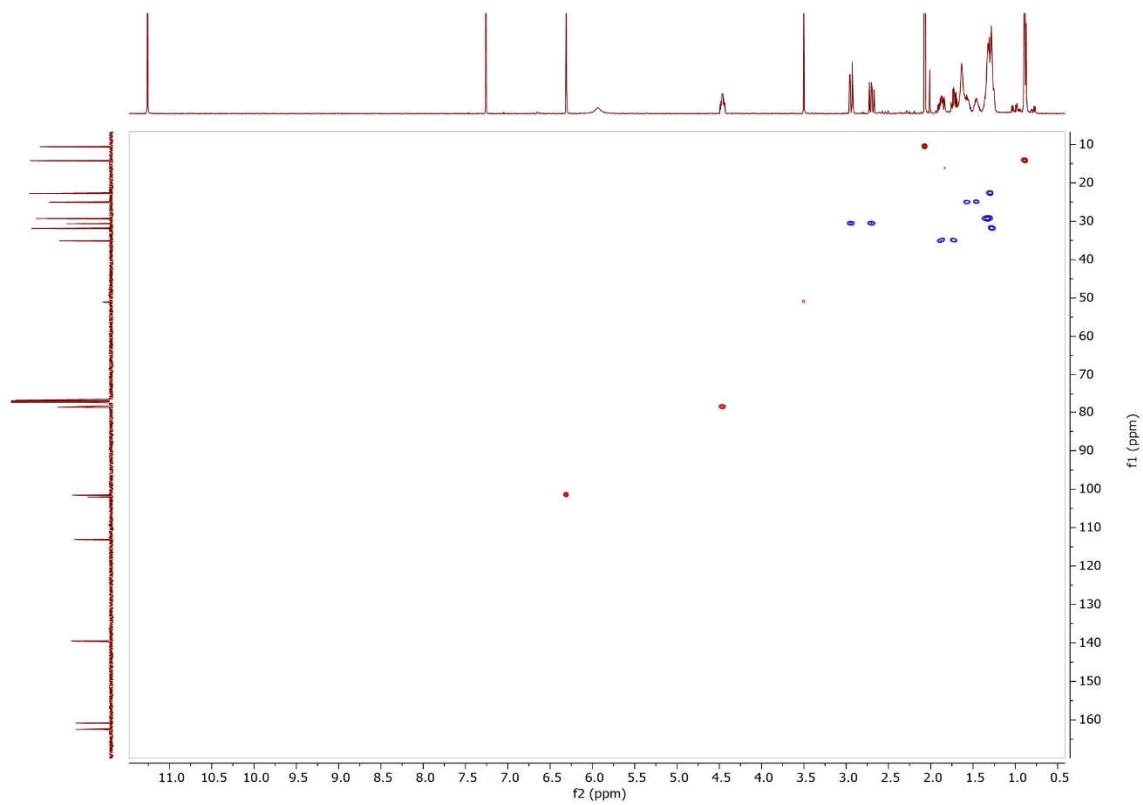

**Figure S5.** HMBC spectrum of compound **1** (CDCl<sub>3</sub>, 600/150 MHz)

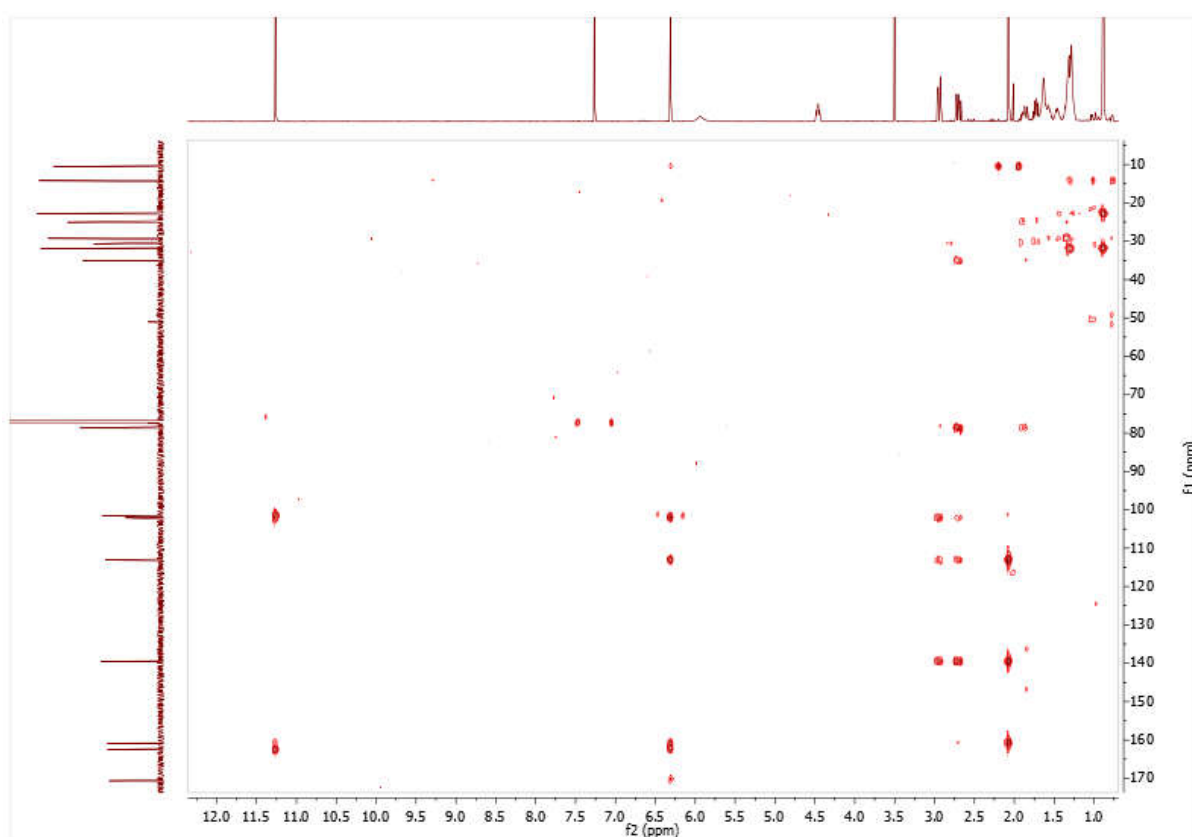

**Figure S6.** TOCSY spectrum of compound **1** (CDCl<sub>3</sub>, 600 MHz)

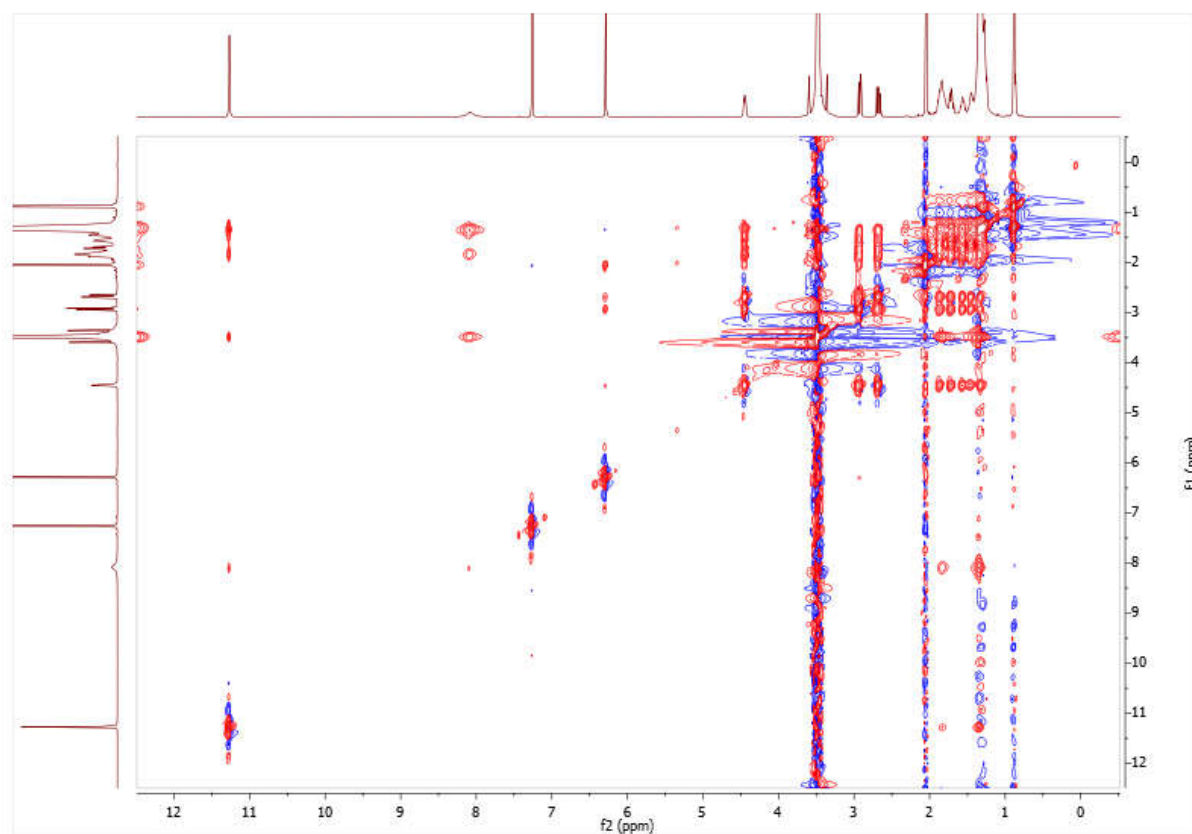

**Figure S7.** NOESY spectrum of compound **1** (CDCl<sub>3</sub>, 600 MHz)

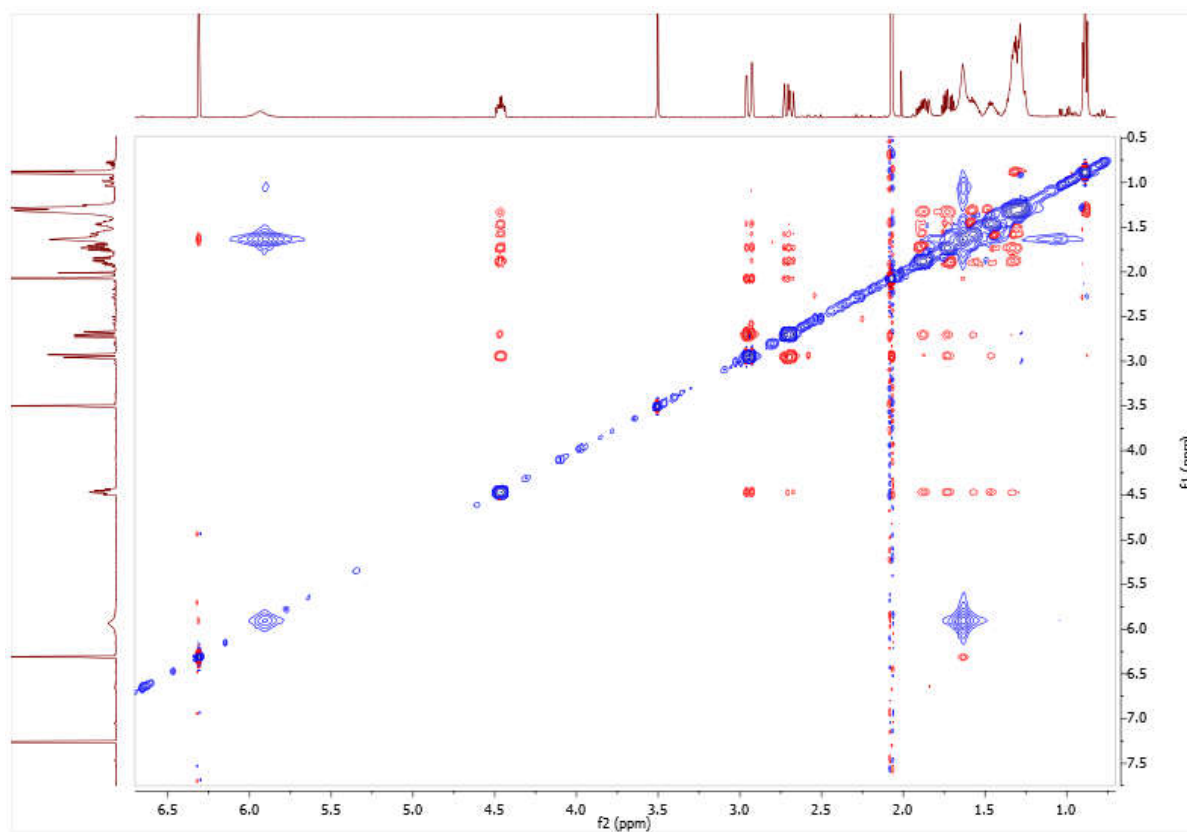

**Figure S8.** <sup>1</sup>H NMR spectrum of compound **1** (CD<sub>3</sub>OD, 500 MHz)

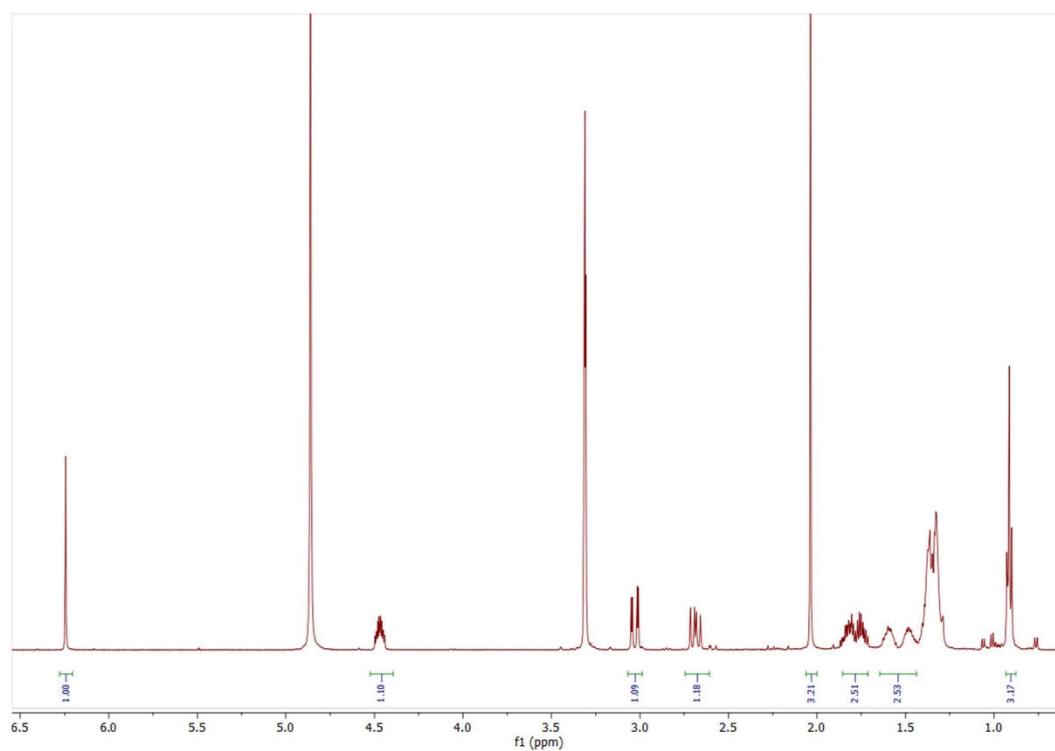

**Figure S9.** HR-ESIMS spectrum of compound **1**

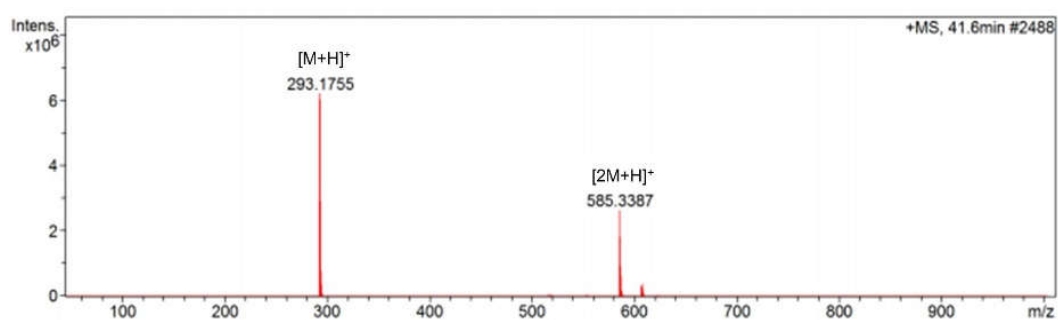

**Figure S10.** HR-ESIMS/MS spectrum of compound **1**

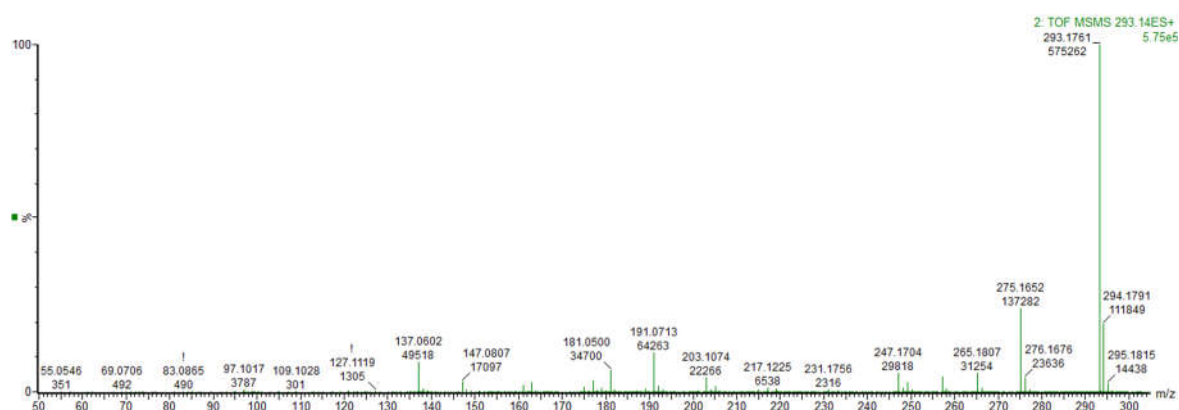

**Figure S11.** FT-IR spectrum of compound **1**

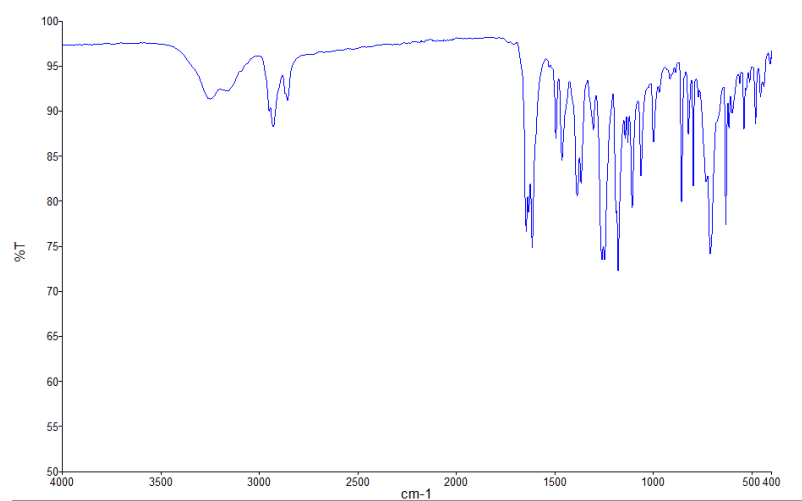

**Figure S12.**  $^1\text{H}$  NMR spectrum of compound **2** ( $\text{CDCl}_3$ , 600 MHz)

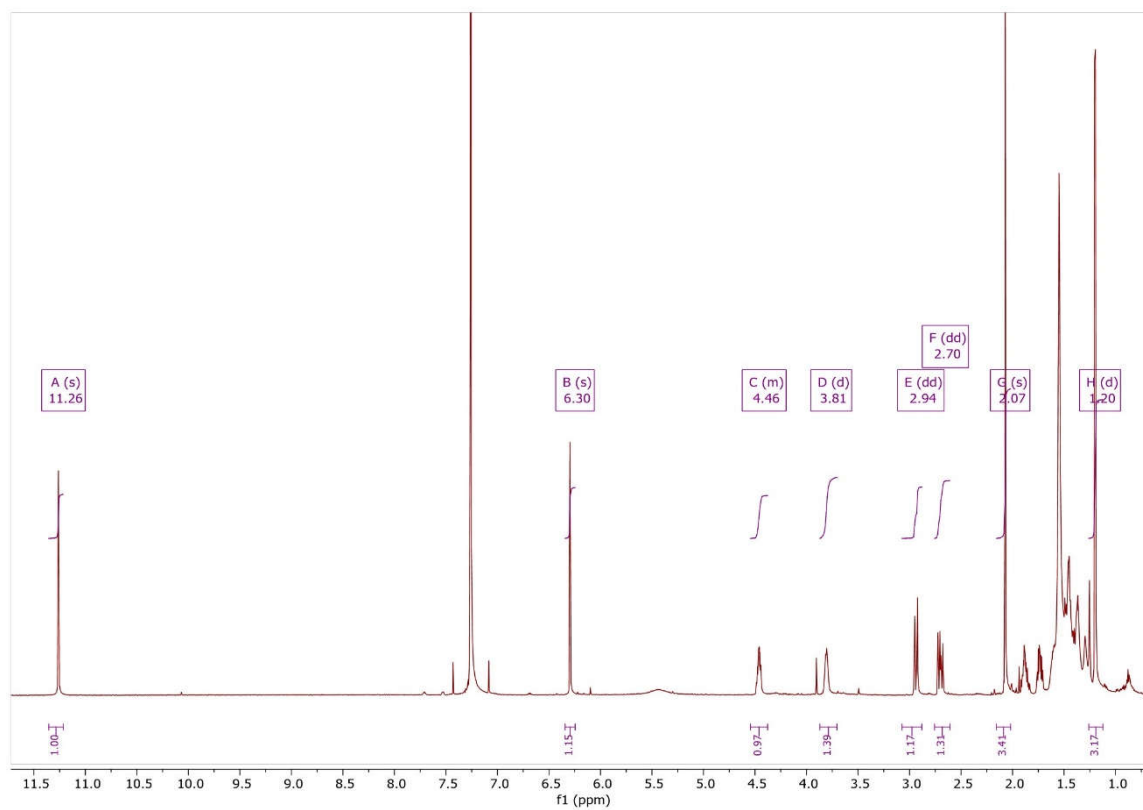

**Figure S13.**  $^{13}\text{C}$  spectrum of compound **2** ( $\text{CDCl}_3$ , 150 MHz)

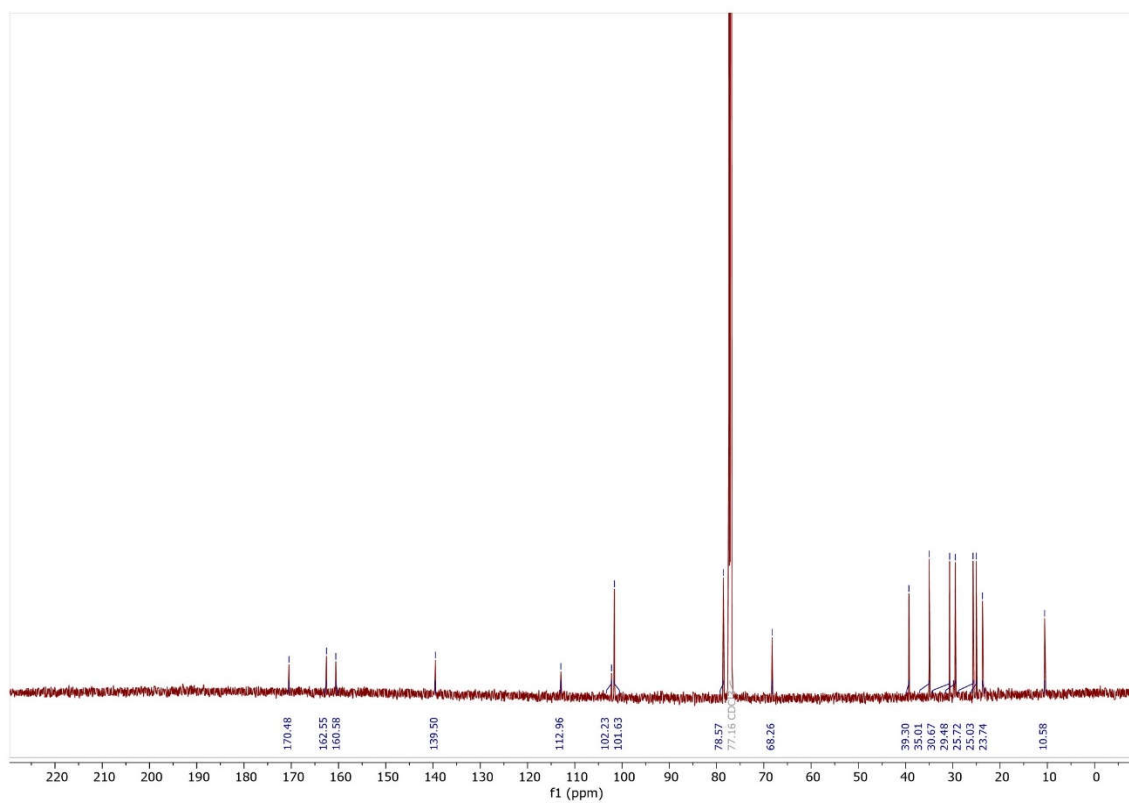

**Figure S14.** COSY spectrum of compound **2** (CDCl<sub>3</sub>, 600 MHz)

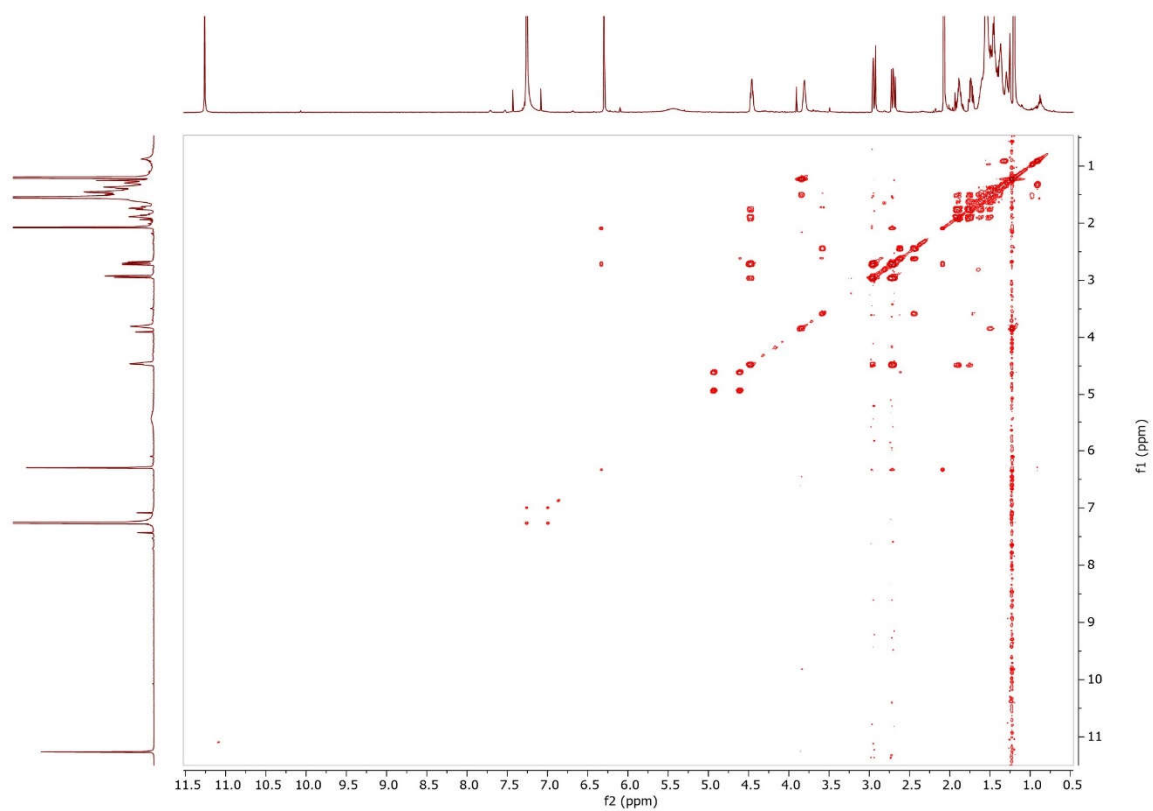

**Figure S15.** HSQC spectrum of compound **2** (CDCl<sub>3</sub>, 600/150 MHz)

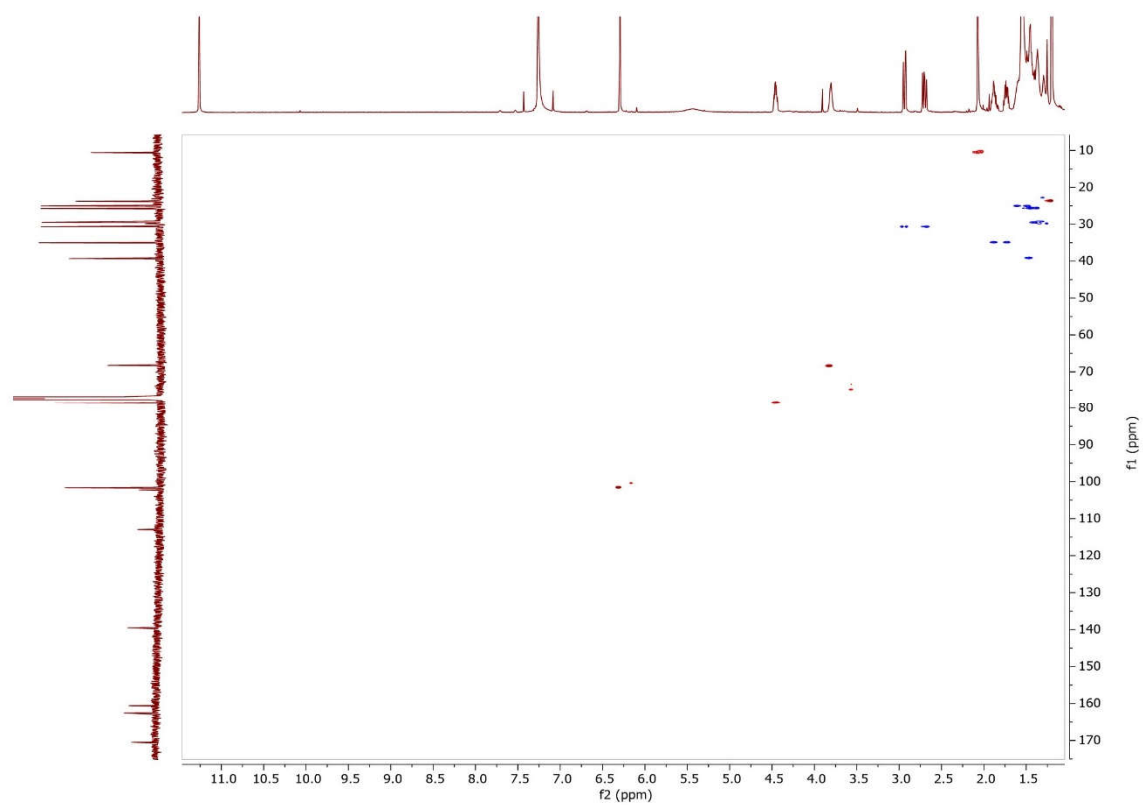



**Figure S16.** HMBC spectrum of compound **2** (CDCl<sub>3</sub>, 600/150 MHz)

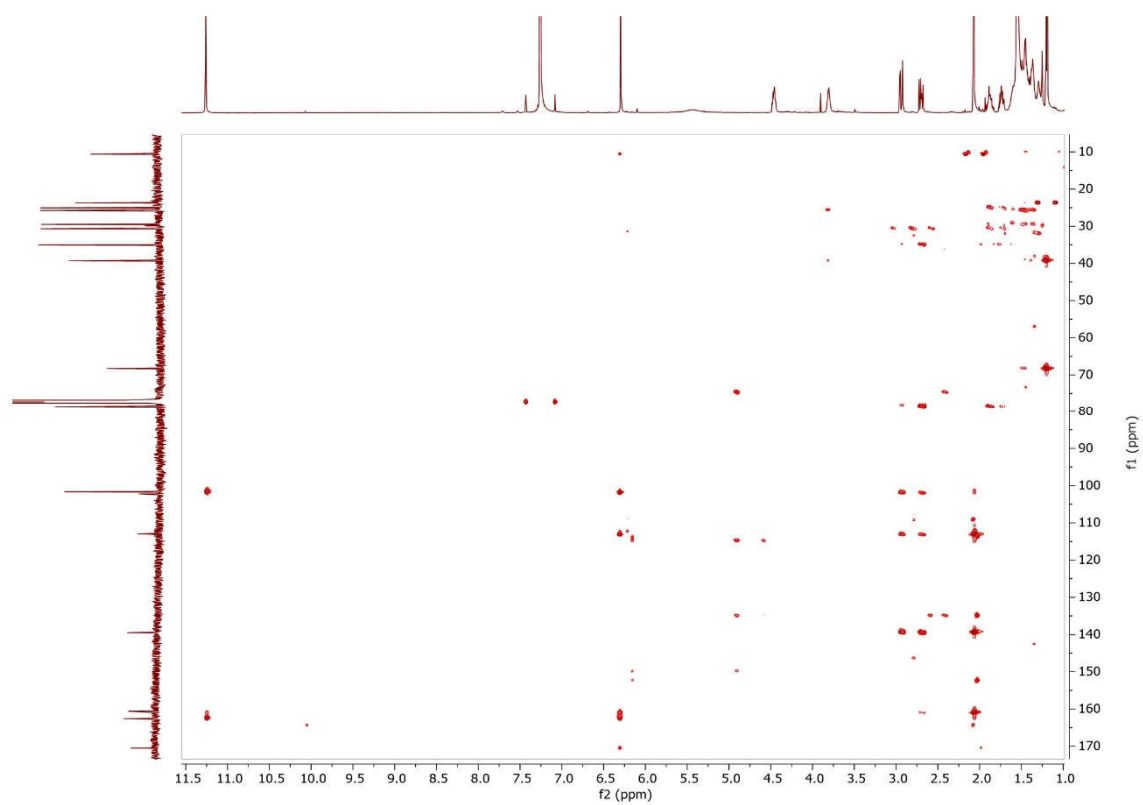

**Figure S17.** NOESY spectrum of compound **2** (CDCl<sub>3</sub>, 600 MHz)

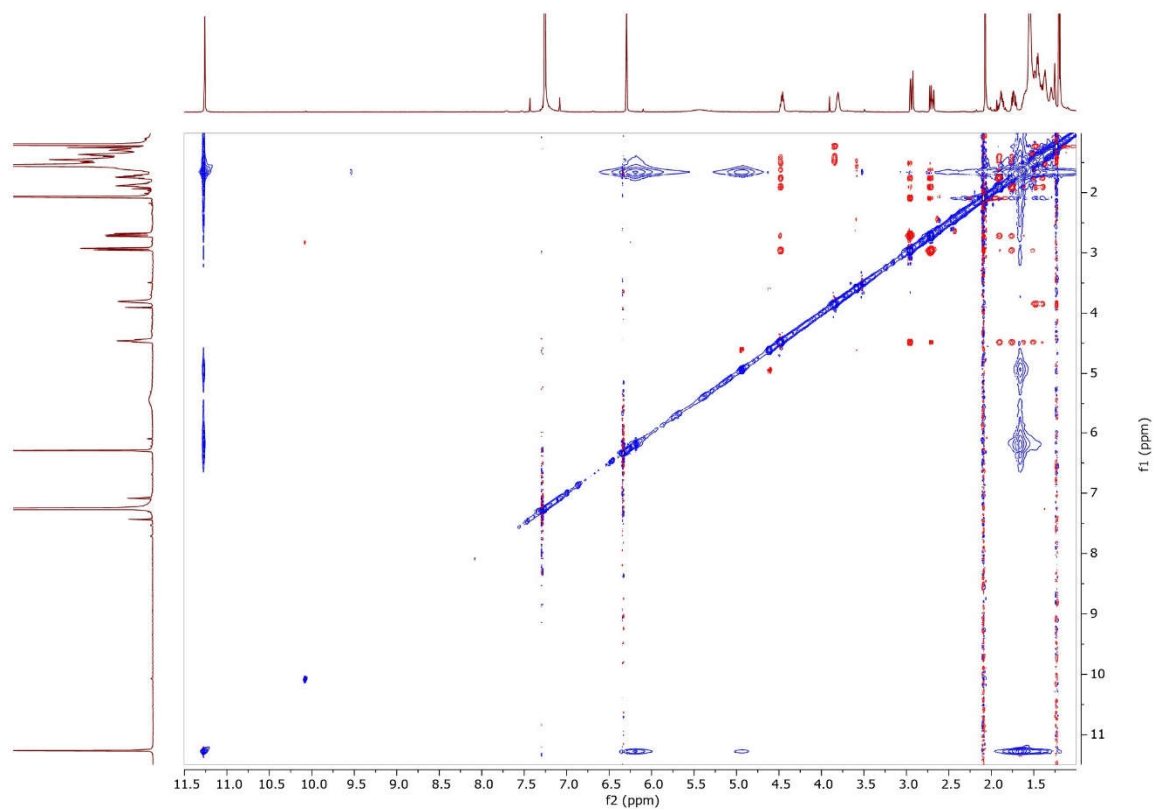

**Figure S18.** HR-ESIMS spectrum of compound **2**

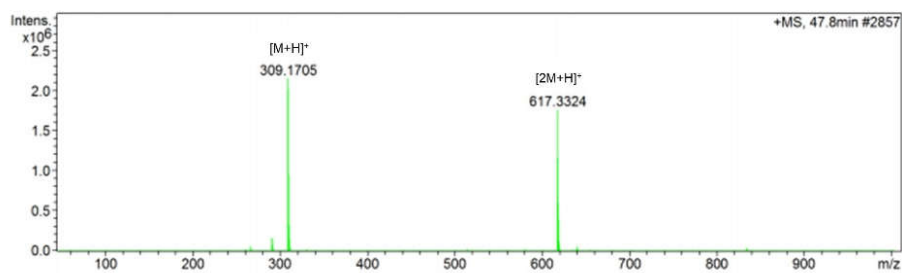

**Figure S19.** HR-ESIMS/MS spectrum of compound **2**

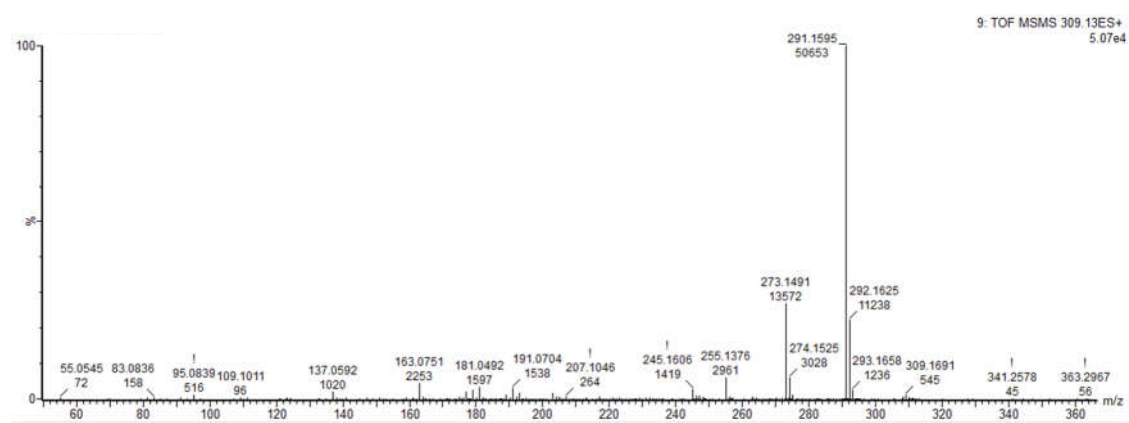

**Figure S20.** FT-IR spectrum of compound **2**

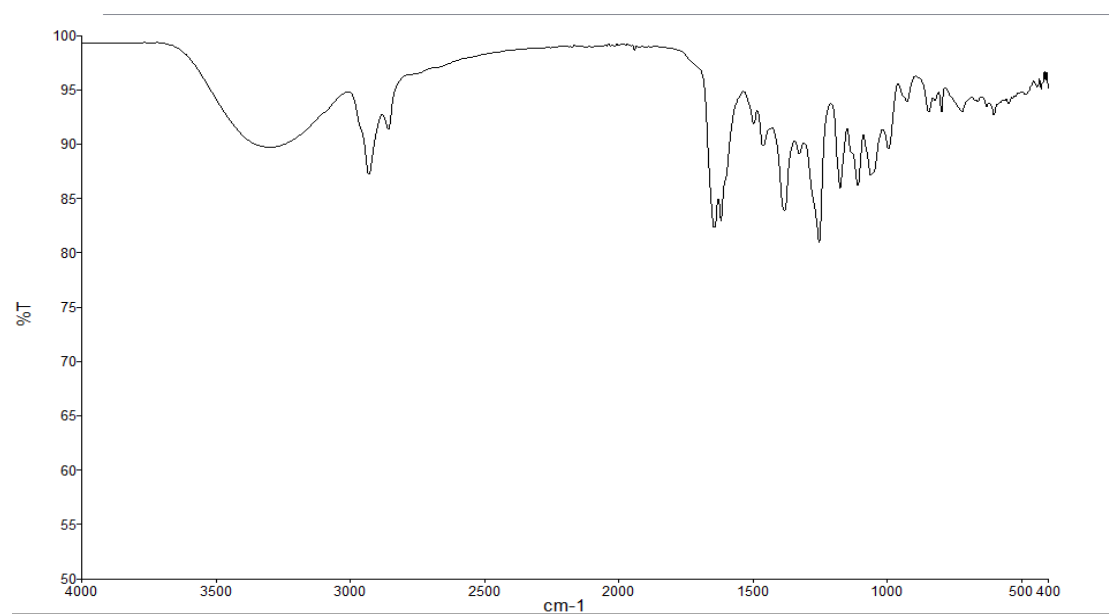

**Figure S21.**  $^1\text{H}$  NMR spectrum of compound **3** ( $\text{CDCl}_3$ , 600 MHz)

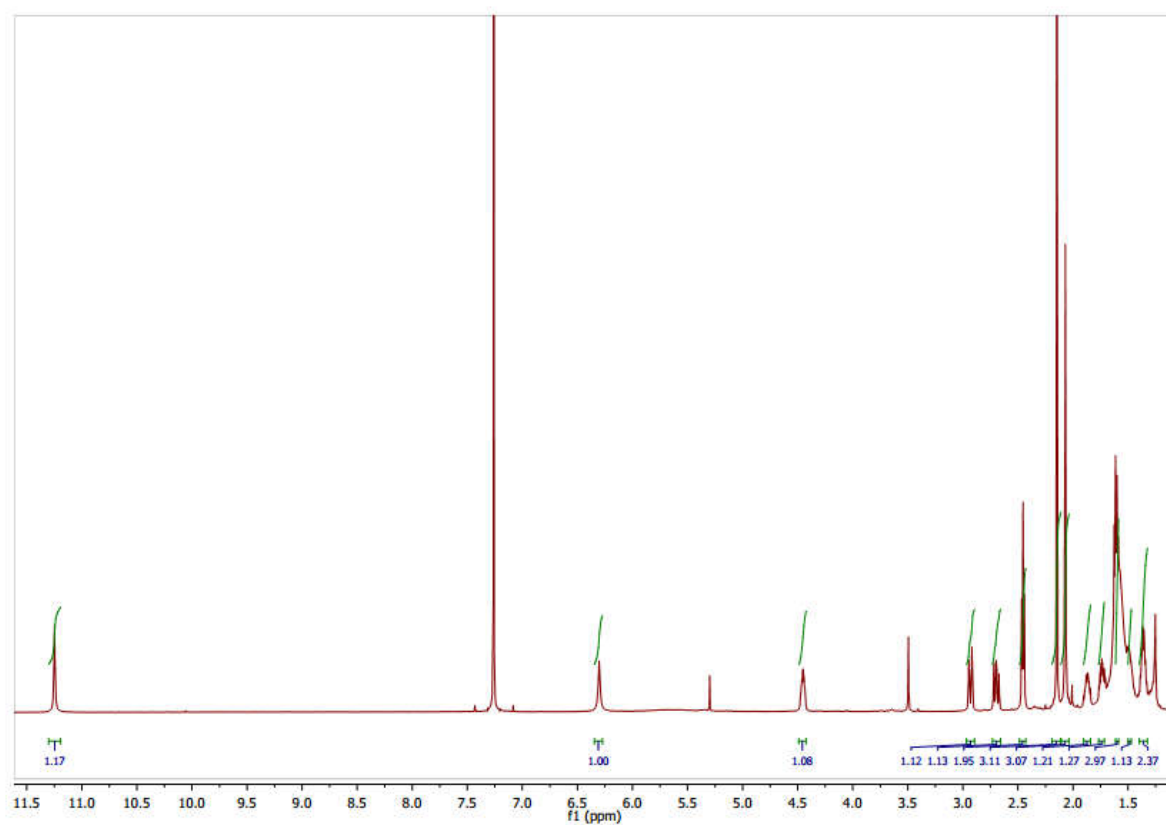

**Figure S22.**  $^{13}\text{C}$  NMR spectrum of compound **3** ( $\text{CDCl}_3$ , 150 MHz)

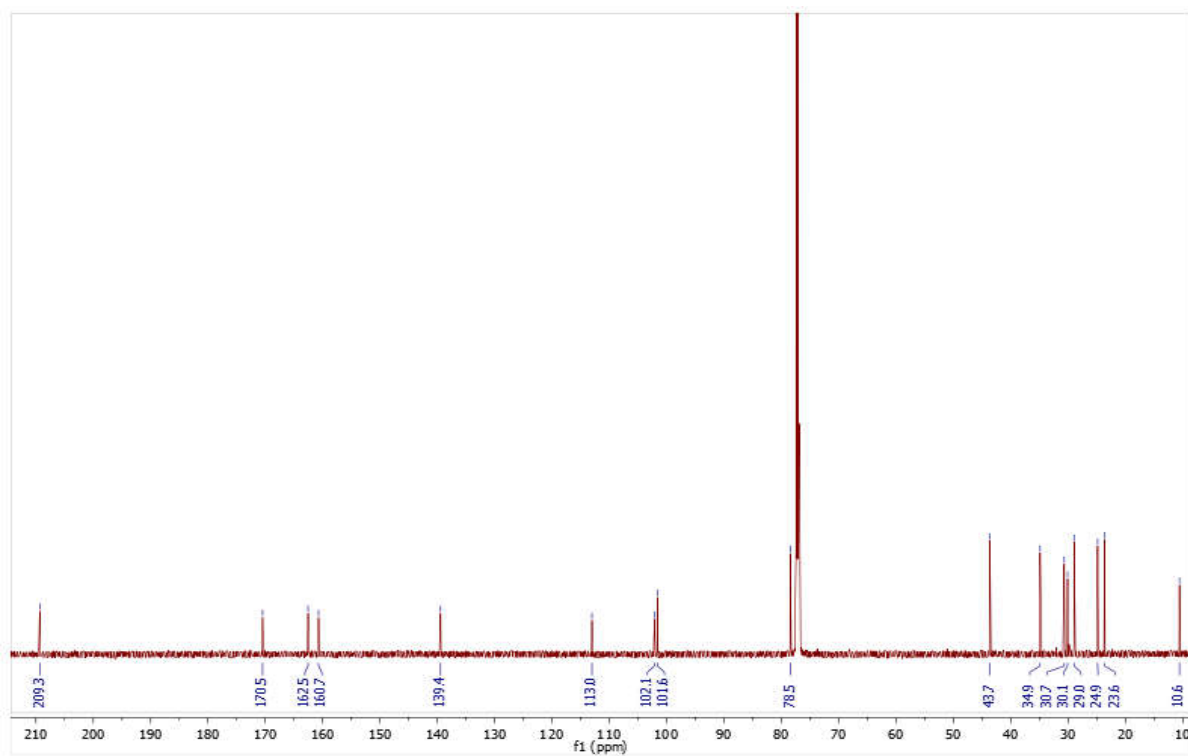

**Figure S23.** COSY spectrum of compound **3** (CDCl<sub>3</sub>, 600 MHz)

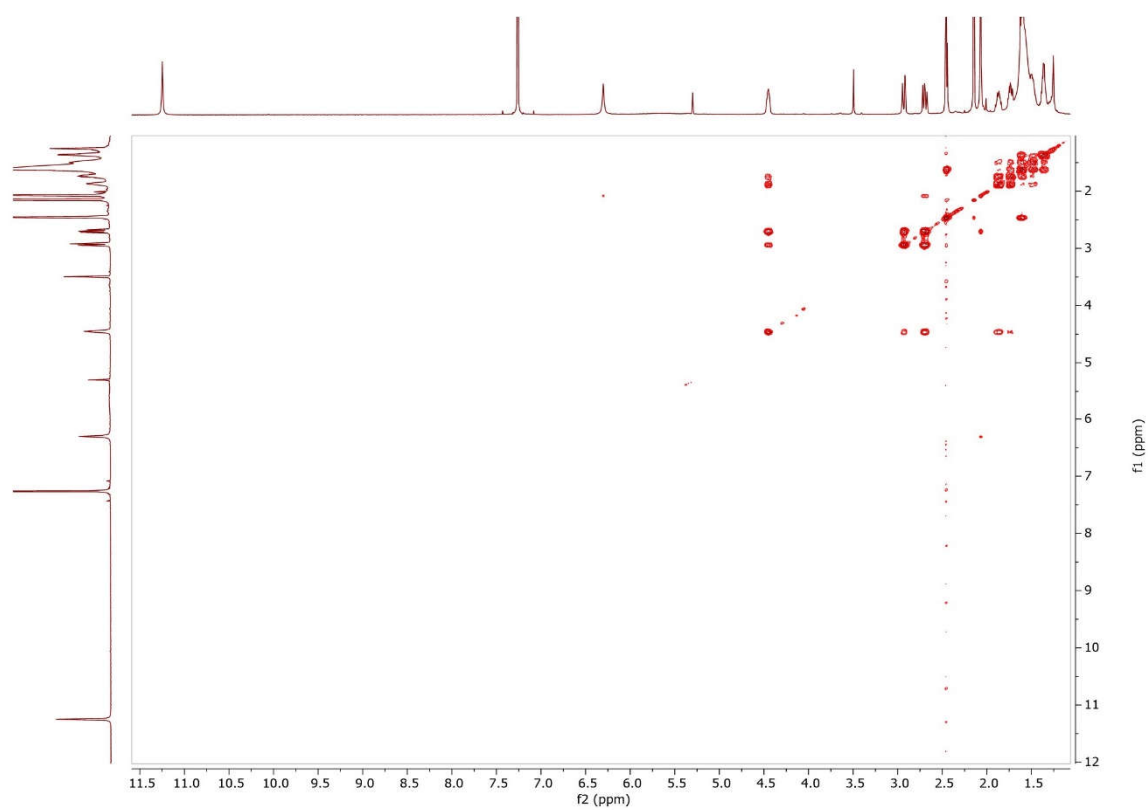

**Figure S24.** HSQC spectrum of compound **3** (CDCl<sub>3</sub>, 600/150 MHz)

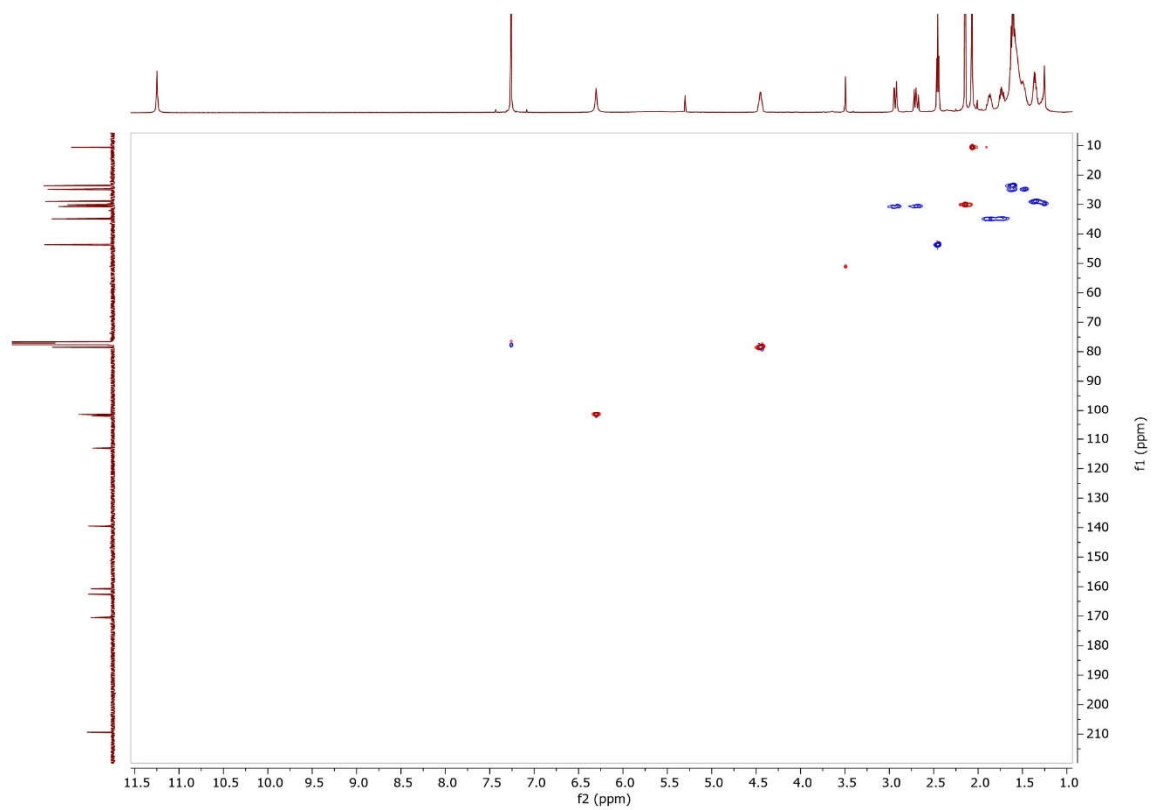

Figure S25. HMBC spectrum of compound 3 (CDCl<sub>3</sub>, 600/150 MHz)

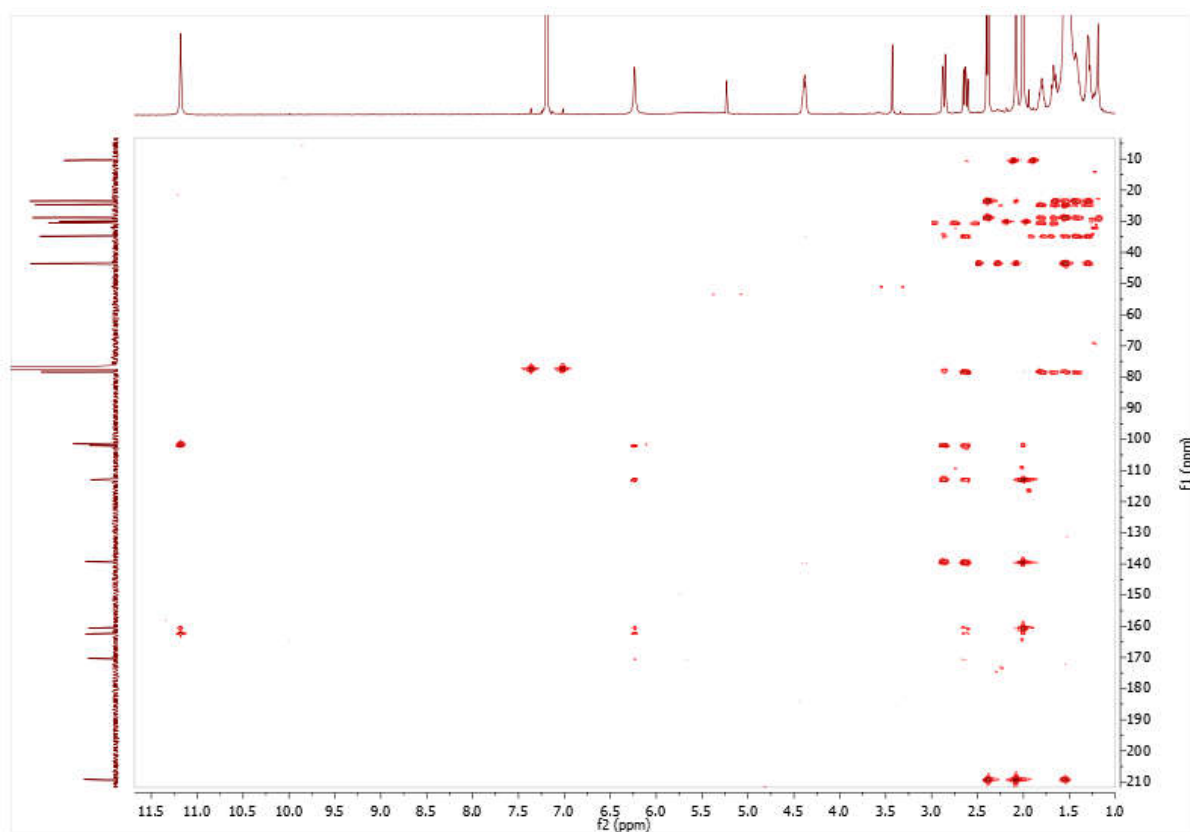

Figure S26. NOESY spectrum of compound 3 (CDCl<sub>3</sub>, 600 MHz)

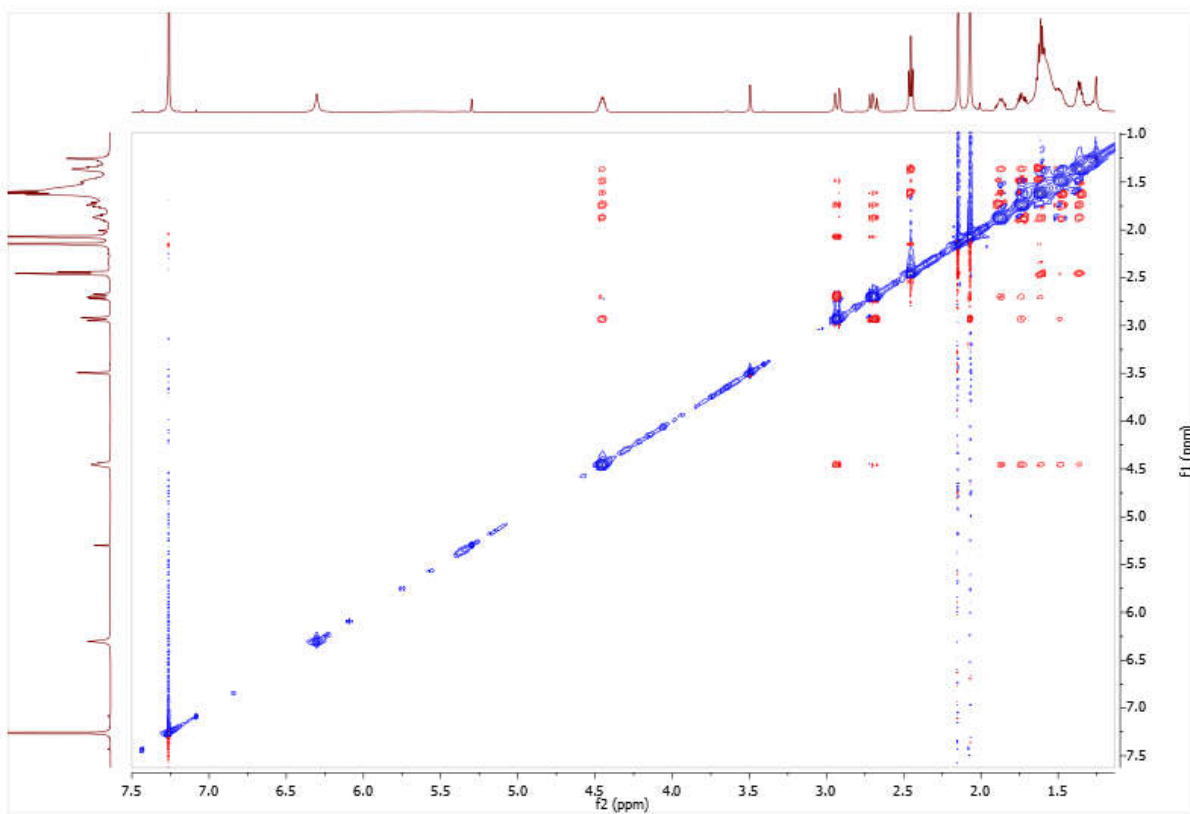

**Figure S27.** HR-ESIMS spectrum of compound **3**

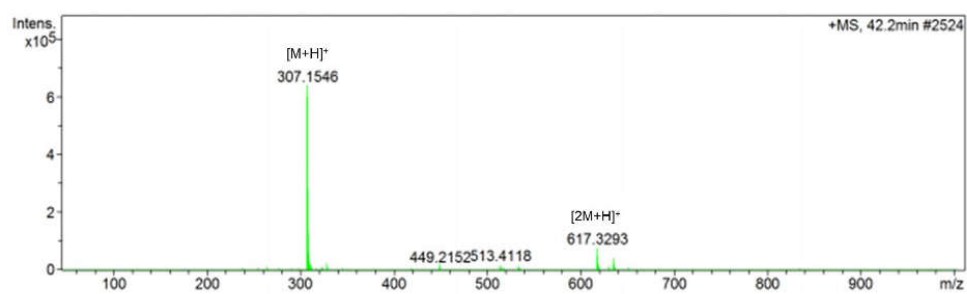

**Figure S28.** HR-ESIMS/MS spectrum of compound **3**

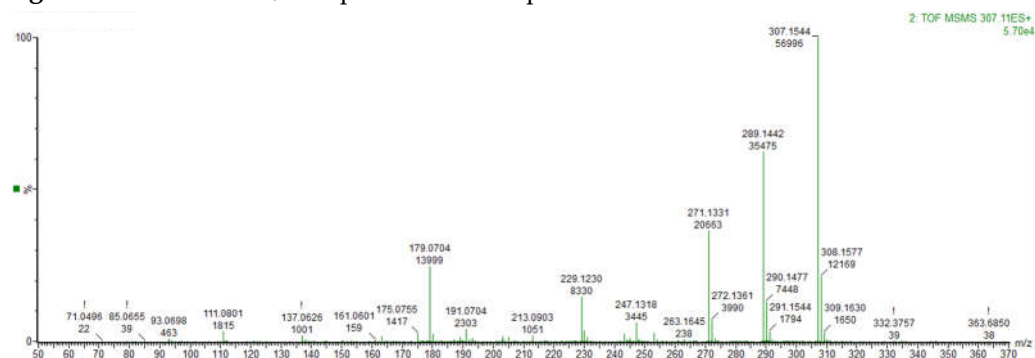

**Figure S29.** FT-IR spectrum of compound **3**

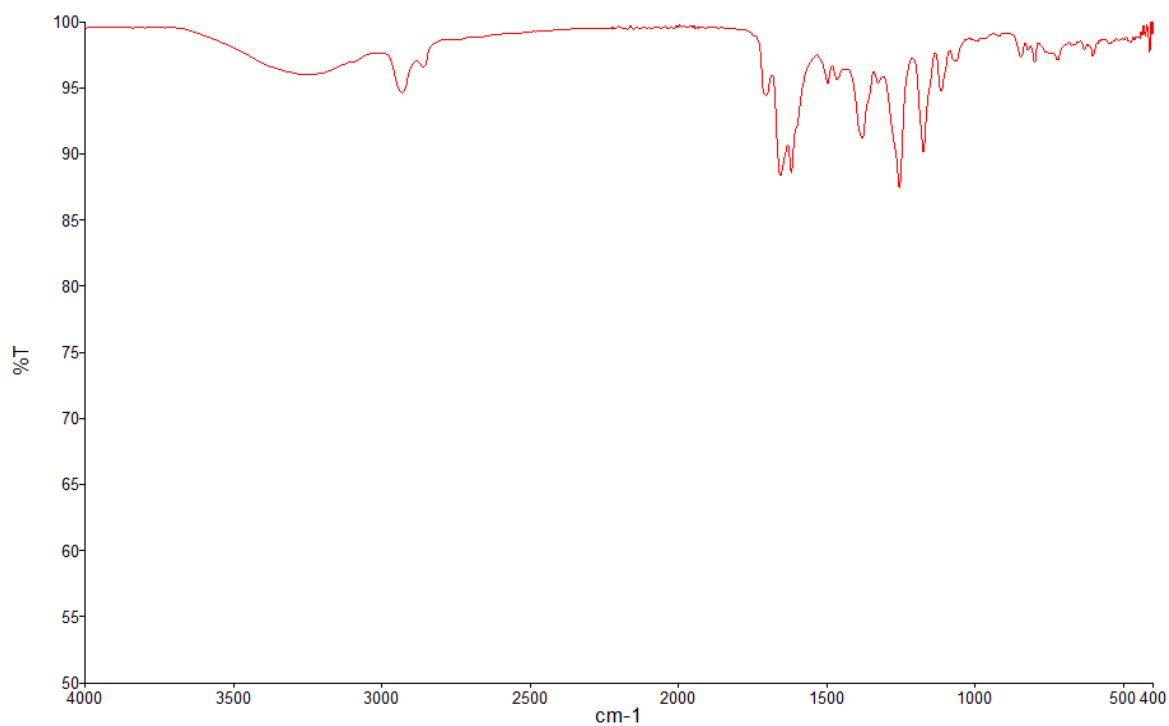

**Figure S30.**  $^1\text{H}$  NMR spectrum of compound **4** ( $\text{CDCl}_3$ , 600 MHz)

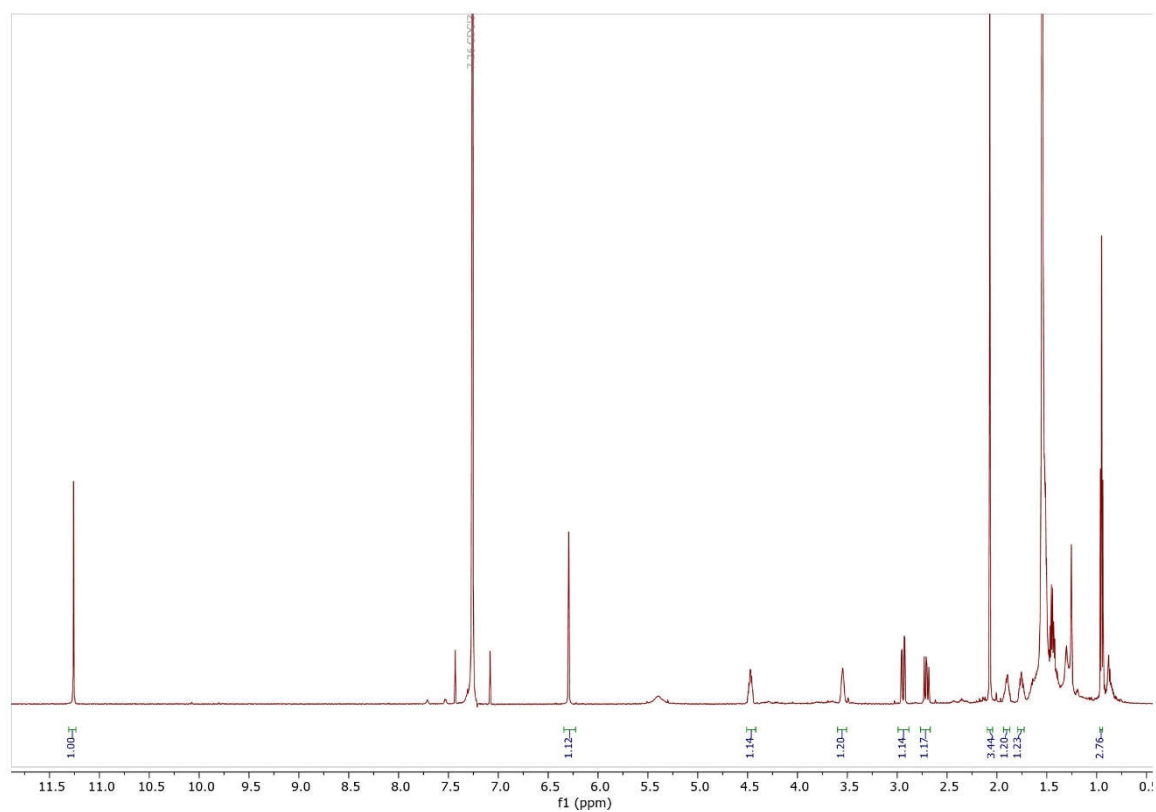

**Figure S31.**  $^{13}\text{C}$  spectrum of compound **4** ( $\text{CDCl}_3$ , 150 MHz)

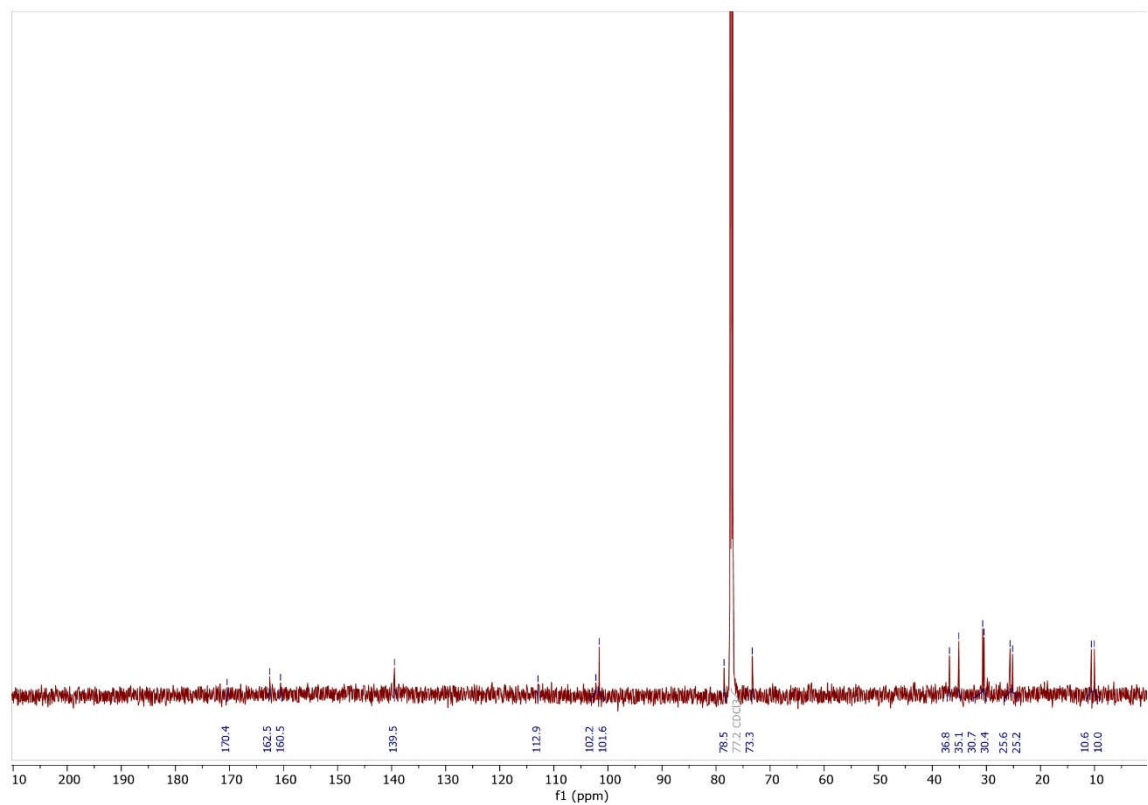

**Figure S32.** COSY spectrum of compound **4** (CDCl<sub>3</sub>, 600 MHz)

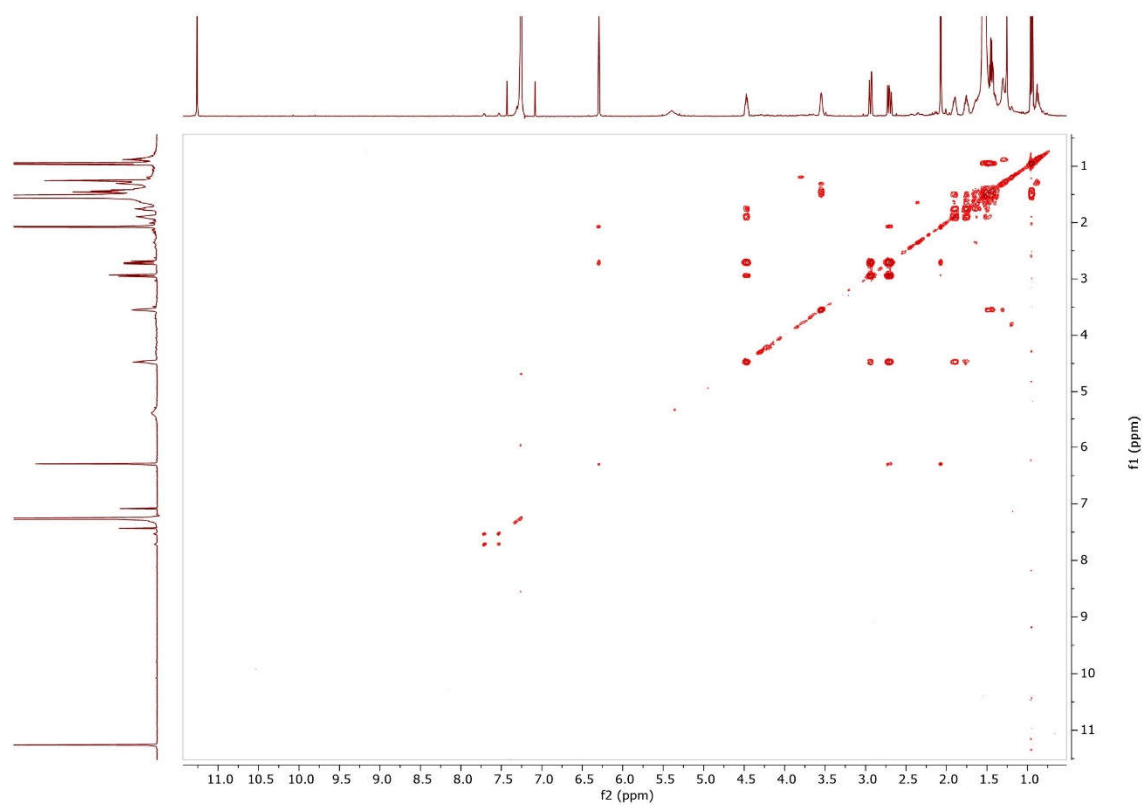

**Figure S33.** HSQC spectrum of compound **4** (CDCl<sub>3</sub>, 600/150 MHz)

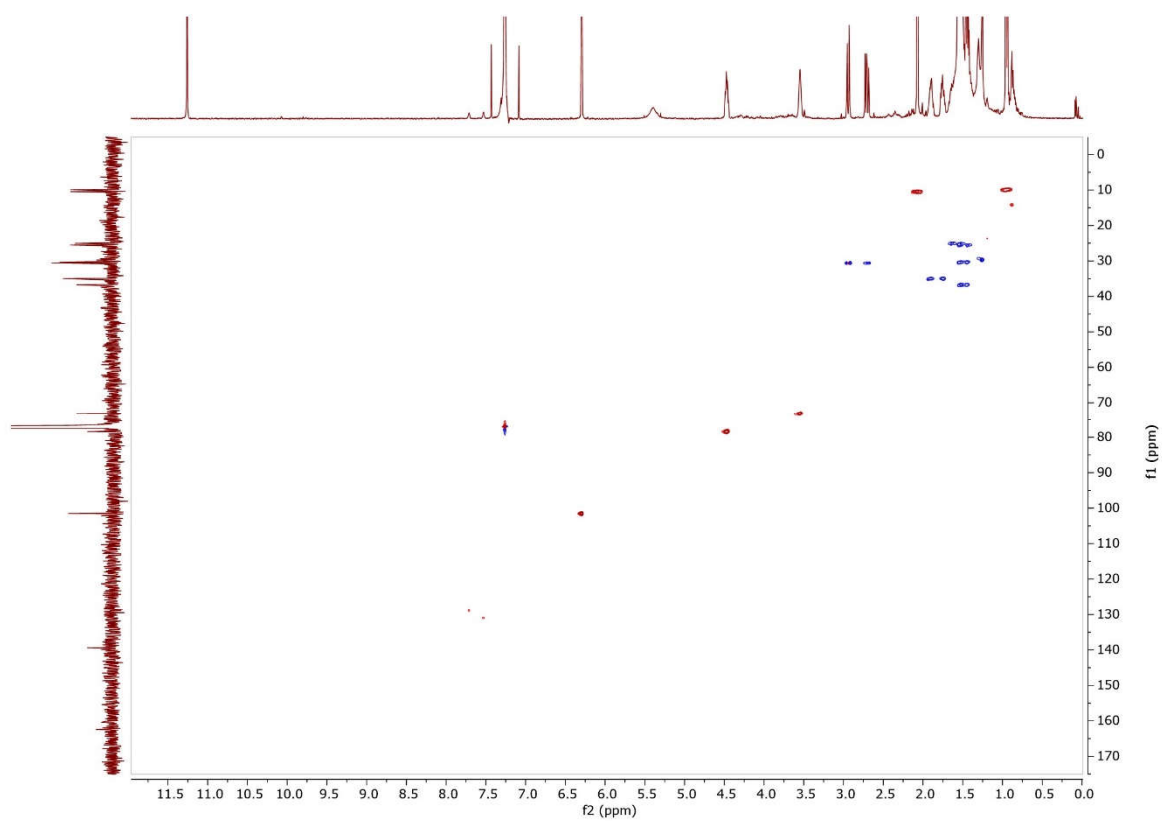



**Figure S34.** HMBC spectrum of compound **4** (CDCl<sub>3</sub>, 600/150 MHz)

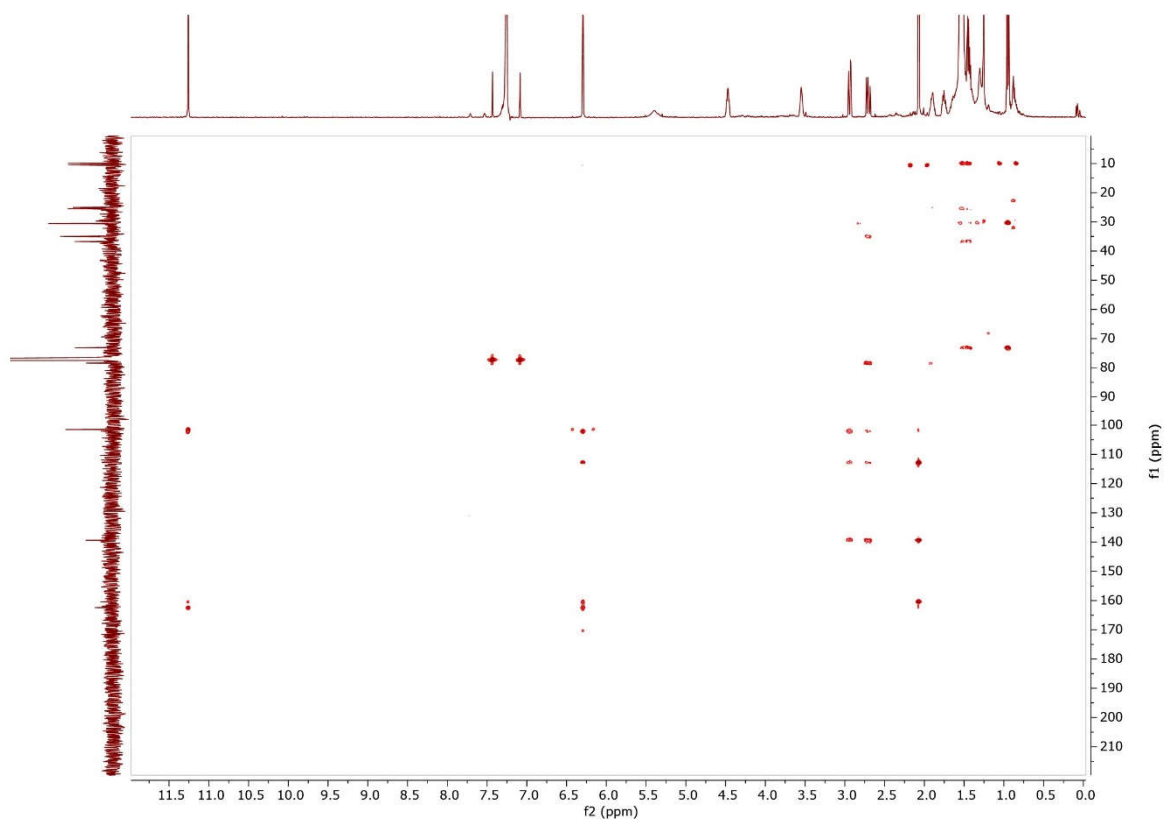

**Figure S35.** NOESY spectrum of compound **4** (CDCl<sub>3</sub>, 600 MHz)

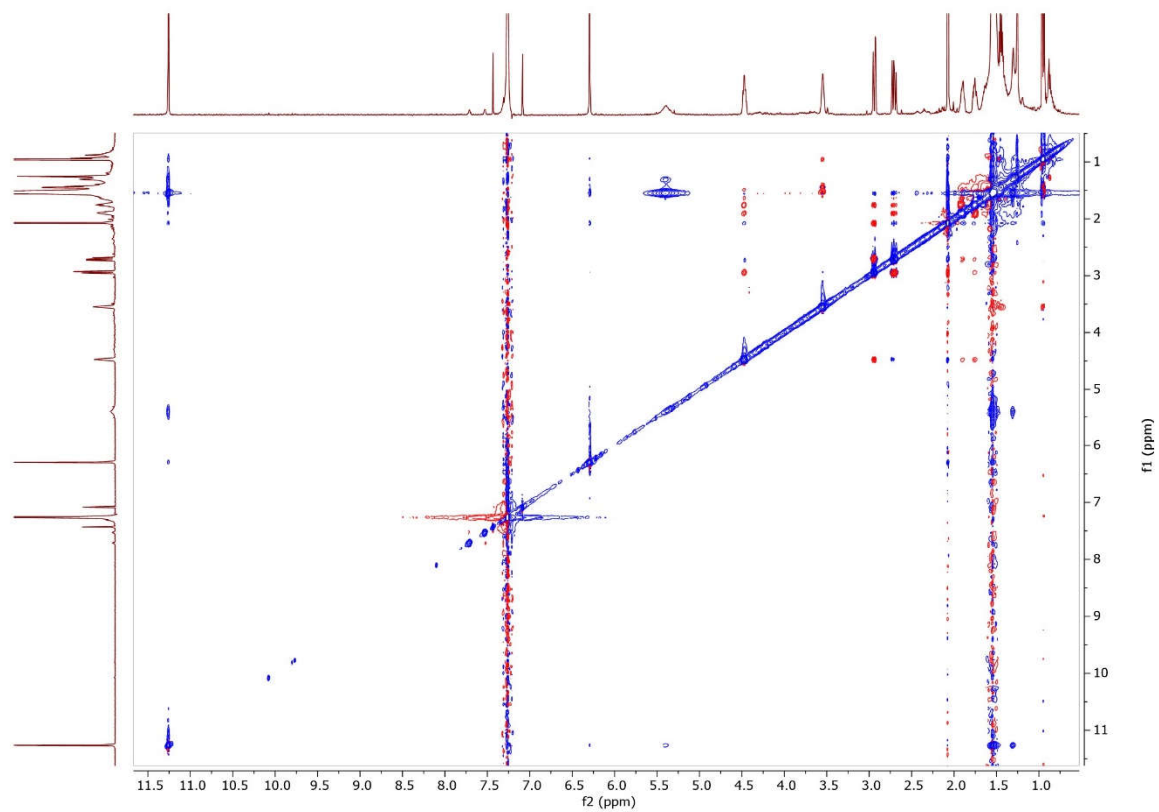

Figure S36. HR-ESIMS spectrum of compound 4

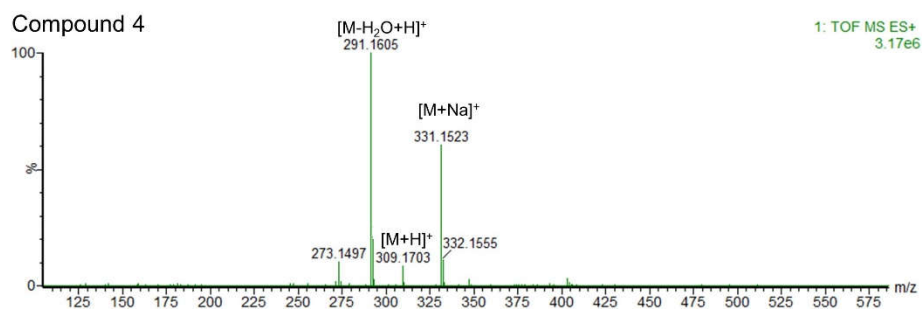

Figure S37. HR-ESIMS/MS spectrum of compound 4

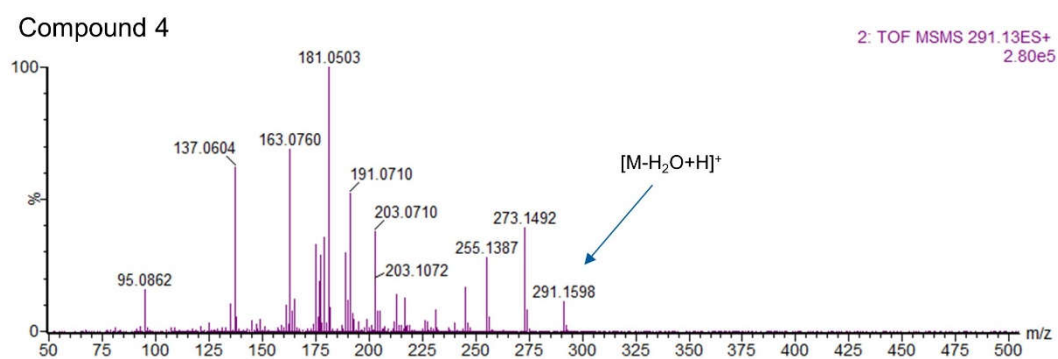

Figure S38. FT-IR spectrum of compound 4

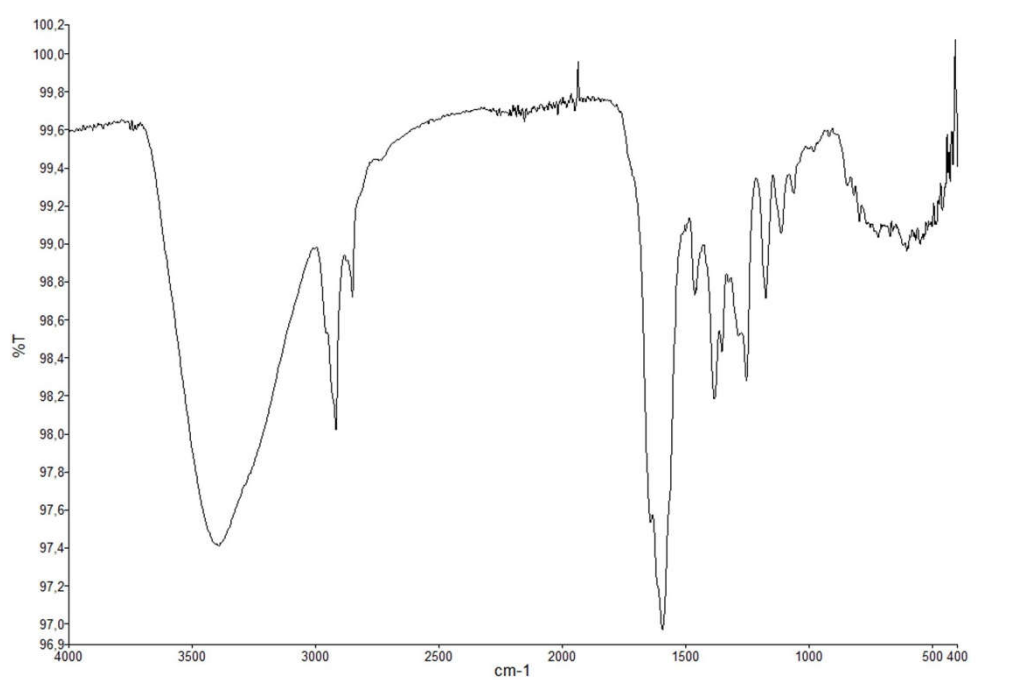

**Figure S39.**  $^1\text{H}$  NMR spectrum of compound **5** ( $\text{CDCl}_3$ , 600 MHz)

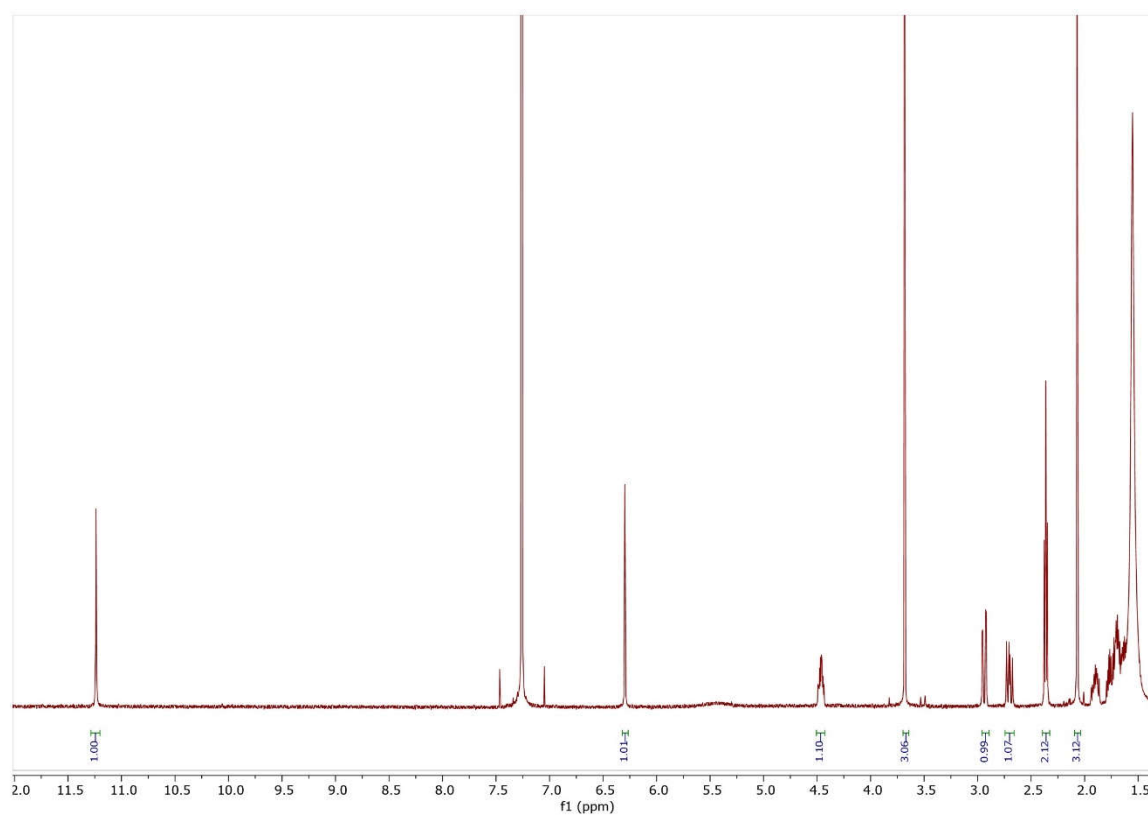

**Figure S40.**  $^{13}\text{C}$  spectrum of compound **5** ( $\text{CDCl}_3$ , 150 MHz)

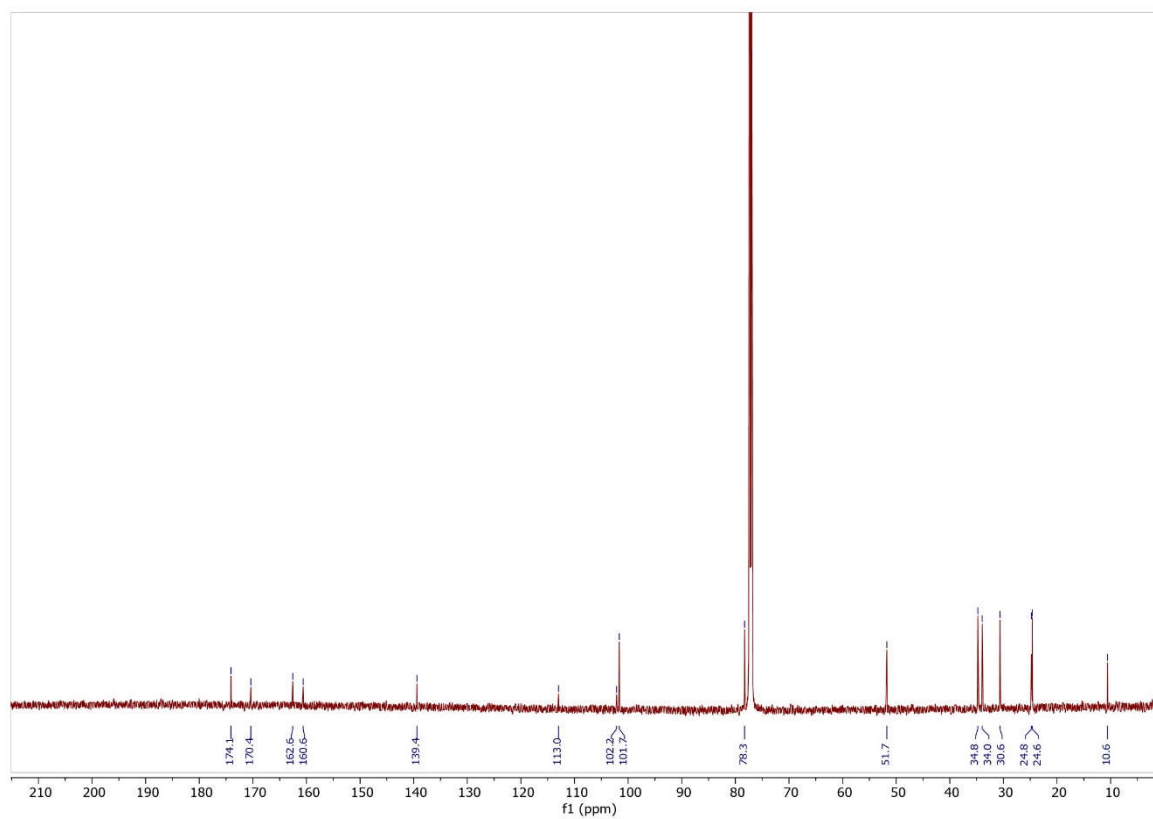

**Figure S41.** COSY spectrum of compound **5** (CDCl<sub>3</sub>, 600 MHz)

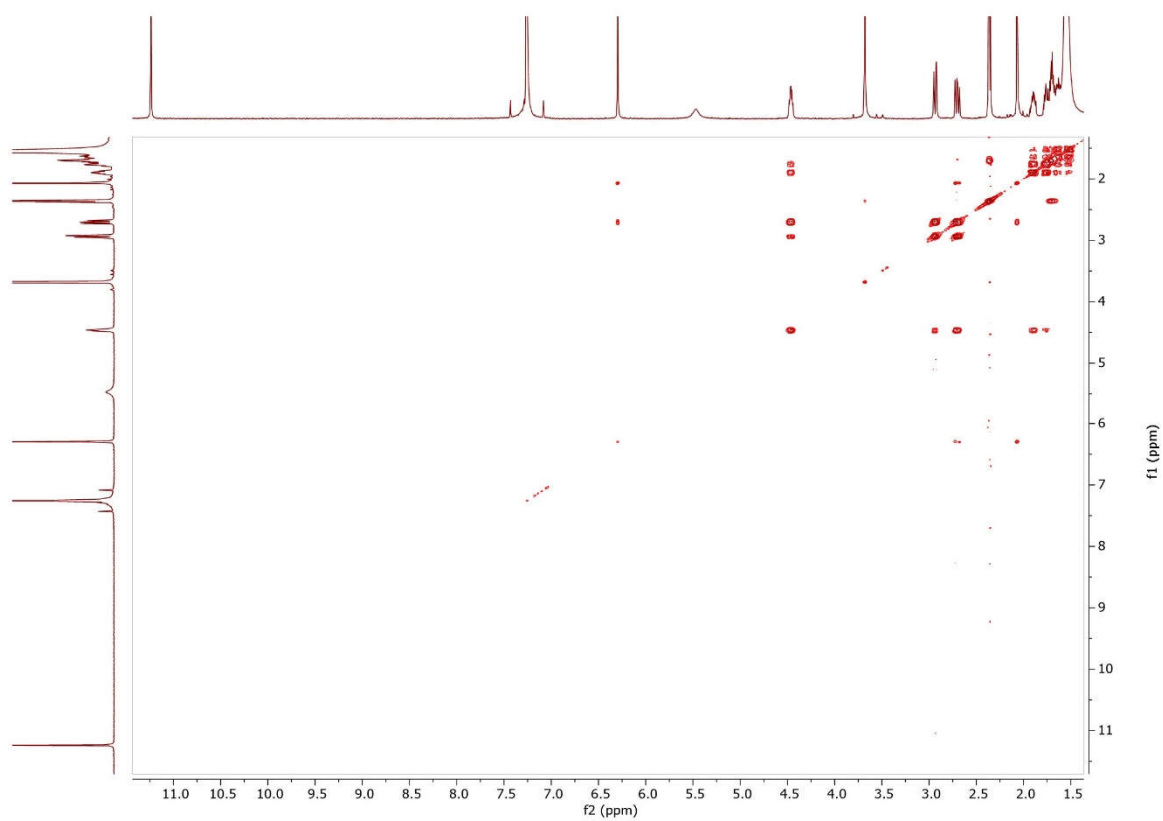

**Figure S42.** HSQC spectrum of compound **5** (CDCl<sub>3</sub>, 600/150 MHz)

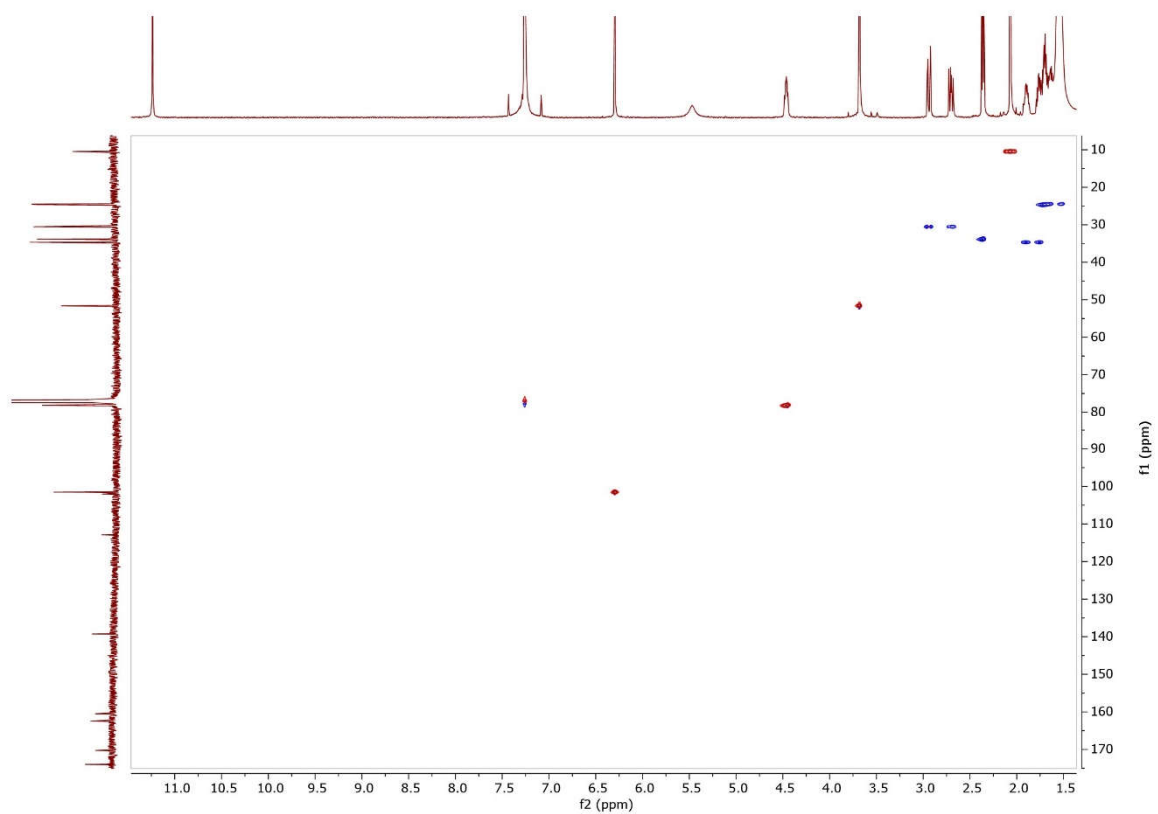

**Figure S43.** HMBC spectrum of compound **5** (CDCl<sub>3</sub>, 600/150 MHz)

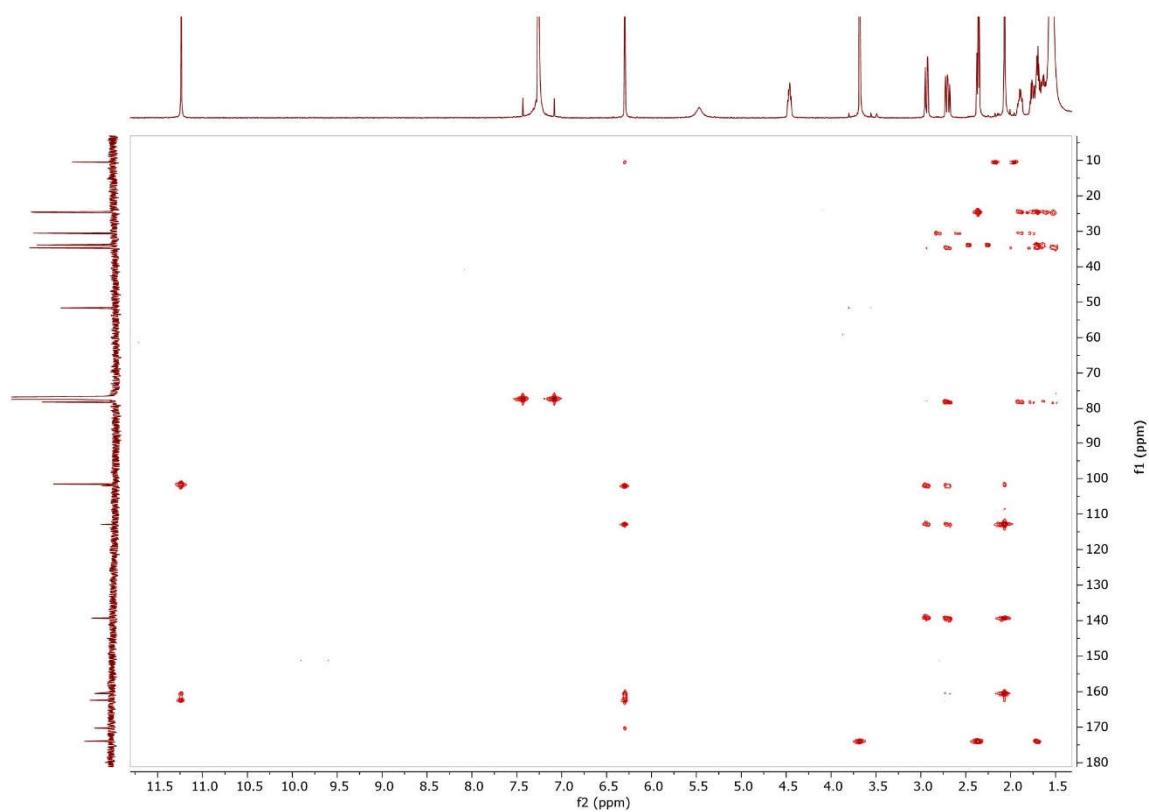

**Figure S44.** NOESY spectrum of compound **5** (CDCl<sub>3</sub>, 600 MHz)

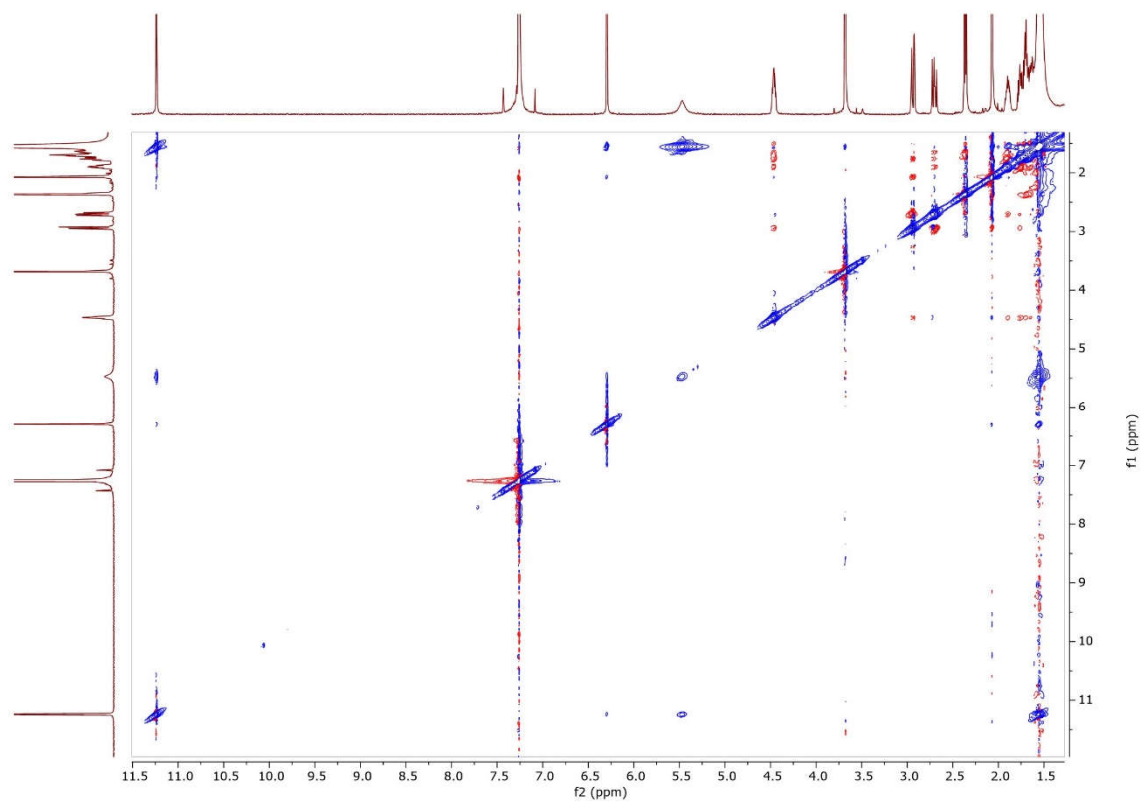

**Figure S45.** HR-ESIMS spectrum of compound 5

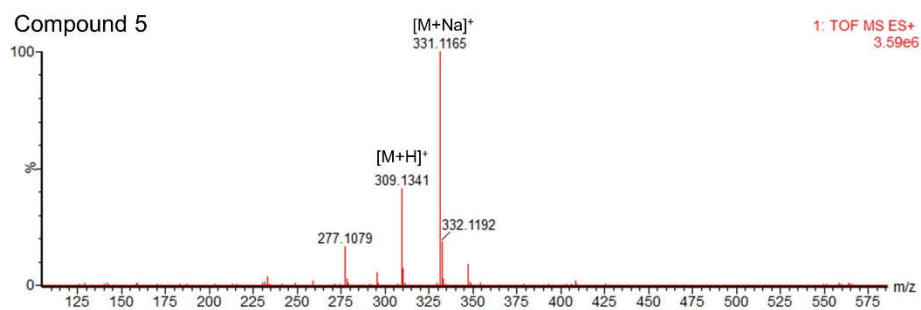

**Figure S46.** HR-ESIMS/MS spectrum of compound 5

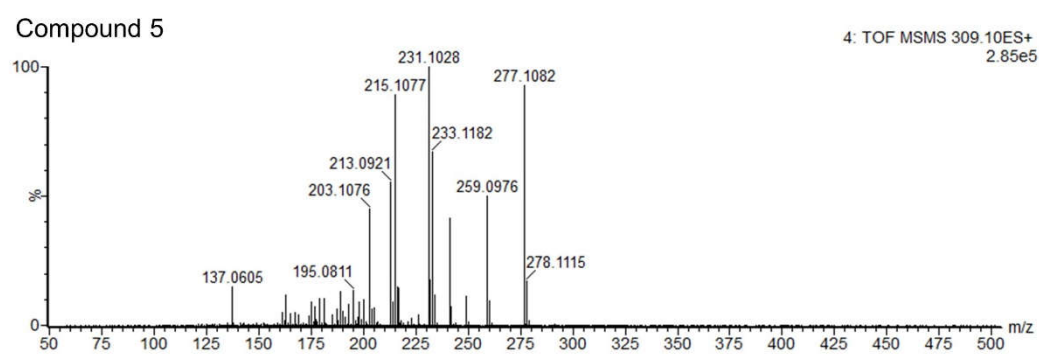

**Figure S47.** FT-IR spectrum of compound 5

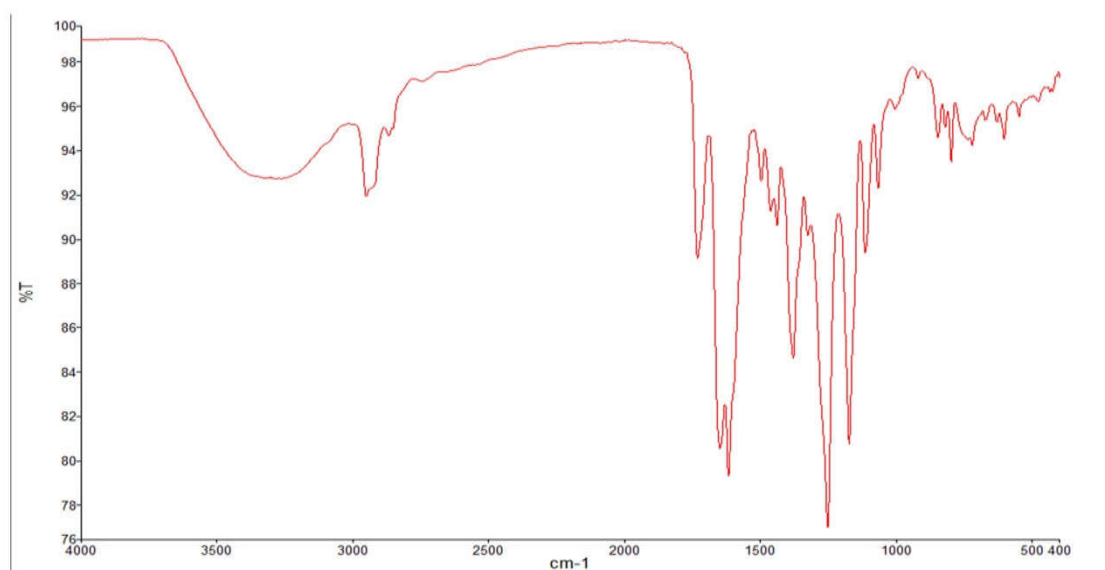

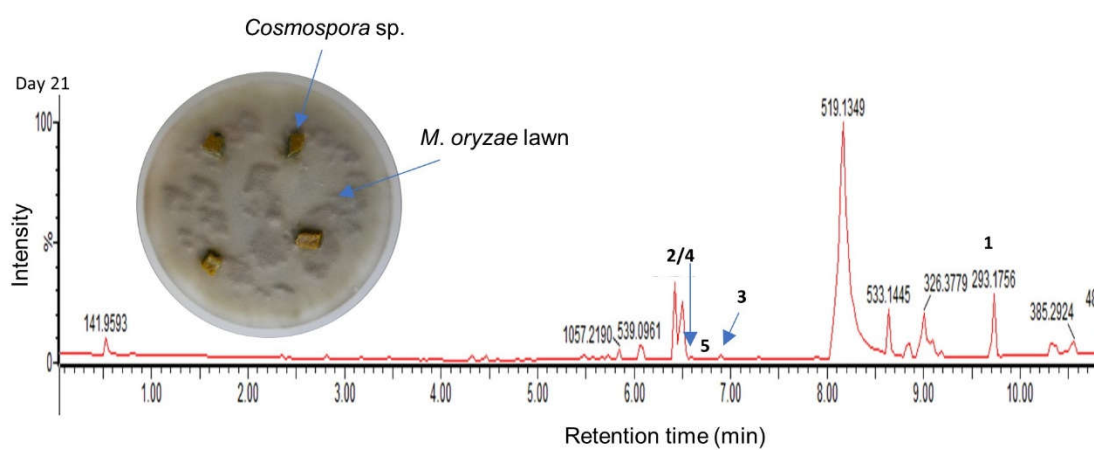

**Figure S48.** Agar plate (9 cm Petri dish) of overlaid co-cultivation of *Cosmospora* sp. on *M. oryzae* after 21 days. UPLC chromatogram of the extract shows the expression of compounds **1-5** with **2-4** in very low intensity.

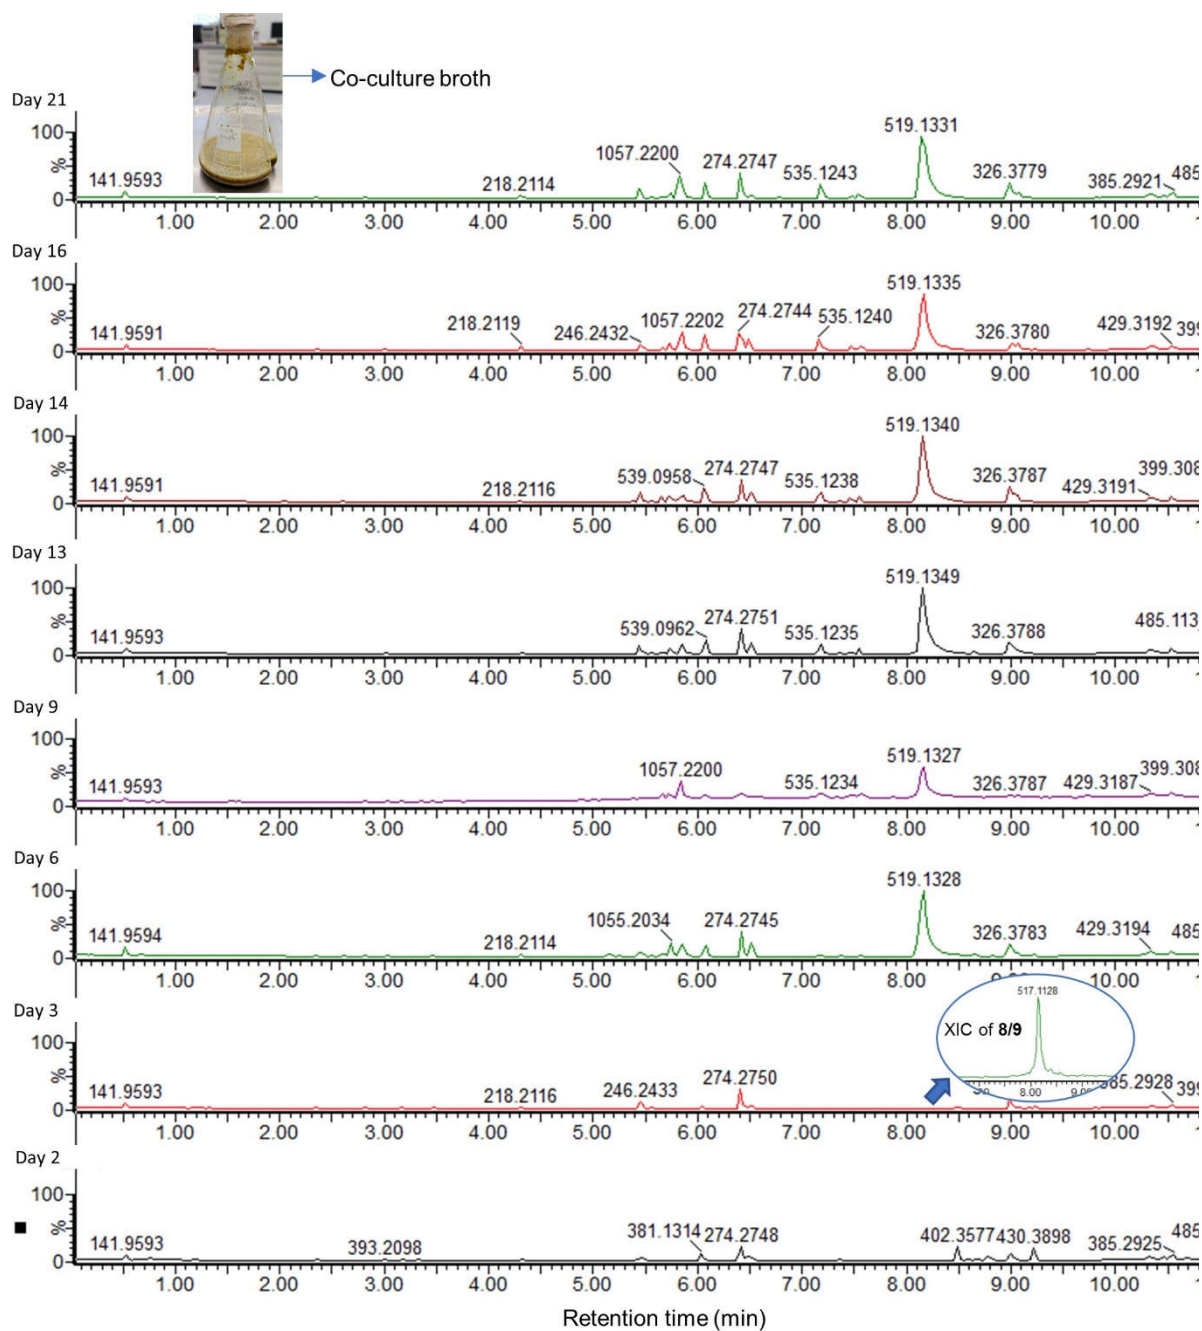

**Figure S49.** UPLC chromatograms of the extracts of co-cultures of *Cosmospora* sp. and *M. oryzae* in potato dextrose broth (PDB) at selected time points (Day 2, 3, 6, 9, 13, 14, 16 and 21). Extracted ion chromatogram (XIC) of compounds 8/9, showing their biosynthesis from day 3 of co-cultivation in PDB medium.



## Mosher's ester analysis

Compound **2** (0.2 mg) was treated with (trimethylsilyl)diazomethane to protect the phenolic OH groups prior to MPA derivatization, to give compound **2m** (Figure S50). The reaction product was split into two aliquots, which were treated separately with a ten-fold molar excess of (*R*)- and (*S*)-MPA acid (methoxyphenylacetic acid), respectively, in the presence of EDC (1-ethyl-3-(3-dimethylaminopropyl)carbodiimide) and DMAP (4-dimethylaminopyridine), to give the corresponding MPA esters (Figure S50).

LC-MS analysis of crude reaction mixtures showed that each reaction produced a mixture in the approximative 2:1 ratio of two isomers with  $m/z$  485.2534, with the same retention times, but with exchanged intensities between the (*R*)-MPA and (*S*)-MPA reactions (Figure S51). Considering that enantiomeric compounds, such as (*R*)-MPA-(6'*R*)-**2m** and (*S*)-MPA-(6'*S*)-**2m** must show the same retention time on a non-chiral HPLC column, the isomers were determined as epimers at C-6'. 1D-TOCSY experiments were performed on the samples from the (*R*)- and (*S*)-MPA reactions (Figure S52). Only the chemical shift of the Me group at 7' could be determined, but this was sufficient to assign configuration. For the most abundant epimer, H<sub>3</sub>-7' was deshielded in the (*R*)-MPA ester and shielded in the (*S*)-MPA esters. This indicated the 6'*R* configuration for the major epimer.

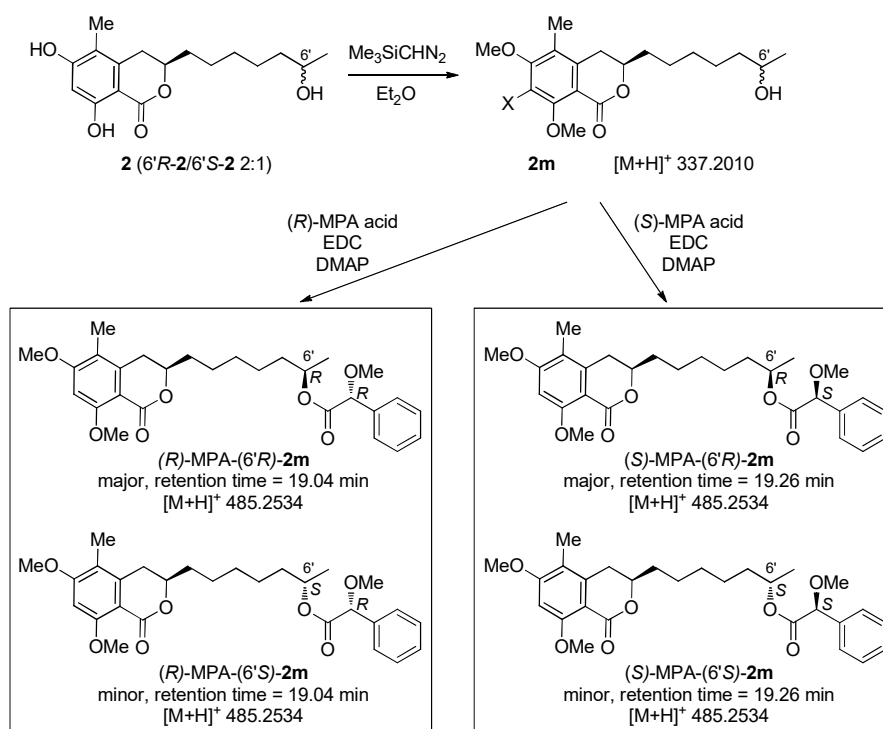

Figure S50: Mosher's ester analysis scheme for compound **2**

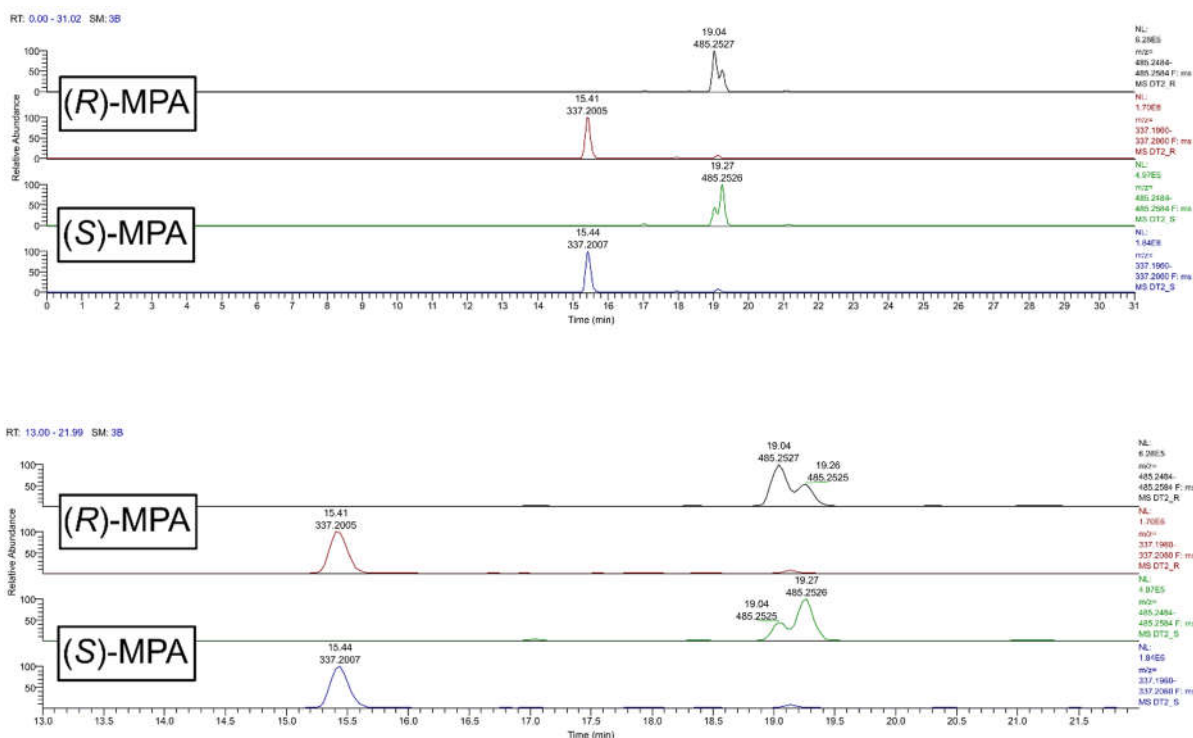

**Figure S51:** Full (top traces) and expanded (bottom traces) LC-MS chromatograms of the (*R*)- and (*S*)-MPA reaction mixtures from compound **2**. The extracted ion chromatograms (XIC) at  $m/z$  485.2534 (MPA esters) of (*R*)-MPA reaction mixture is shown in black and that of (*S*)-MPA reaction mixture is shown in green. The XIC at  $m/z$  337.2010 (unreacted **2m**) of (*R*)-MPA reaction mixture (red trace) and (*S*)-MPA reaction mixture (blue trace) are shown as reference for retention time reproducibility.

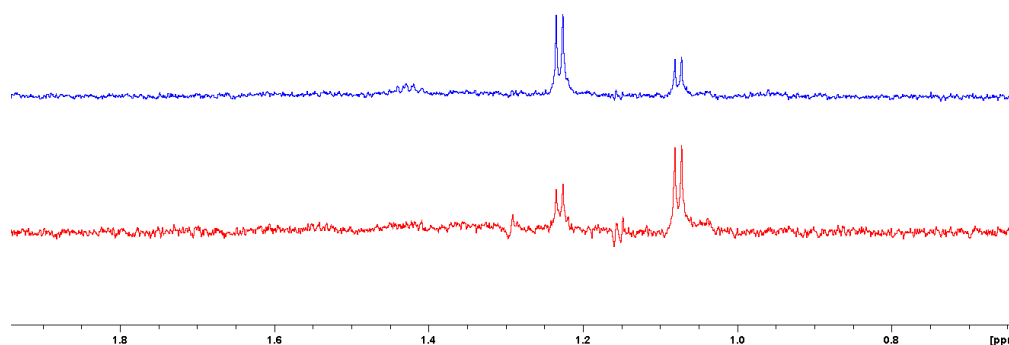

**Figure S52:** NMR analysis of the (*R*)- and (*S*)-MPA reaction mixtures from compound **2**. The 1D-TOCSY spectra of the two samples with excitation window  $\delta$  4.95-4.90 (the chemical shift of H-6' in the esters) are shown. Only the signals of the methyl groups at position 7' were clearly above the noise level. Blue top trace: (*R*)-MPA esters, red bottom trace: (*S*)-MPA esters.

Compound **4** (approximately 0.1 mg) was processed in the same way as described for compound **2**, but only the (*R*)-MPA ester was prepared due to the low amounts of the sample (Figures S53). In this case, LC-MS analysis showed a 1:1 mixture of two isomers at  $m/z$  485.2534 (Figure S54), assigned as epimers at C-5' using the same reasoning as above. Because the LC-MS analysis revealed a 1:1 mixture, no NMR analysis was performed.

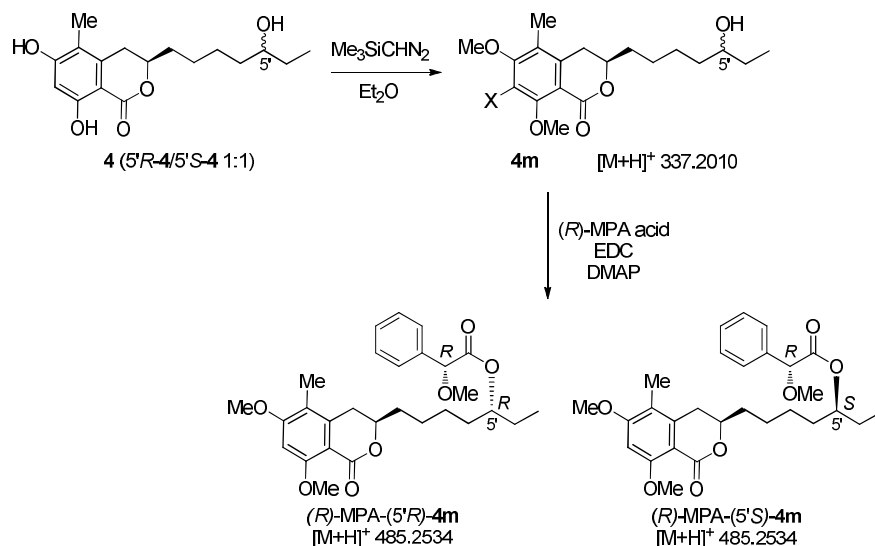

**Figure S53:** Mosher's ester analysis scheme for compound **4**

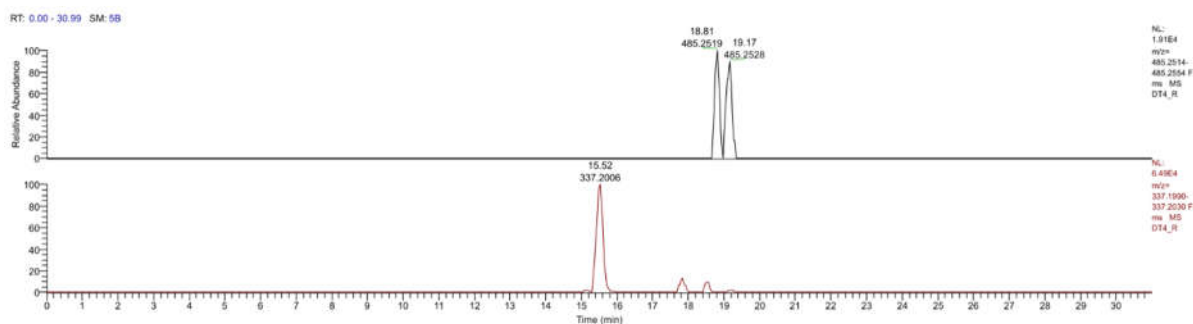

**Figure S54:** LC-MS chromatograms of the (*R*)-MPA reaction mixture from compound **4**. The extracted ion chromatograms (XIC) at  $m/z$  485.2534 (MPA ester) is shown in black, the XIC at  $m/z$  337.2010 (unreacted **4m**) is shown in red.

## References

1. Sumner, L.W.; Amberg, A.; Barrett, D.; Beale, M.H.; Beger, R.; Daykin, C.A.; Fan, T.W.-M.; Fiehn, O.; Goodacre, R.; Griffin, J.L.; et al. Proposed minimum reporting standards for chemical analysis. *Metabolomics* **2007**, *3*, 211-221, doi:10.1007/s11306-007-0082-2.
2. Rusman, Y.; Held, B.W.; Blanchette, R.A.; Wittlin, S.; Salomon, C.E. Soudanones A-G: antifungal isochromanones from the Ascomycetous fungus *Cadophora* sp. isolated from an iron mine. *J. Nat. Prod.* **2015**, *78*, 1456-1460, doi:10.1021/acs.jnatprod.5b00204.
3. Kock, I.; Draeger, S.; Schulz, B.; Elsässer, B.; Kurtán, T.; Kenéz, Á.; Rheinheimer, J. Pseudoanguillosporin A and B: two new isochromans isolated from the endophytic fungus *Pseudoanguillospora* sp. *Eur. J. Org. Chem.* **2009**, *2009*, 1427-1434, doi:10.1002/ejoc.200801083.
4. Koyama, K.; Natori, S. Further characterization of seven bis (naphtho- $\gamma$ -pyrone) congeners of ustilaginoidins, coloring matters of *Claviceps virens* (*Ustilagoidea virens*). *Chem. Pharm. Bull.* **1988**, *36*, 146-152, doi:10.1248/cpb.36.146.
5. Wang, Y.; Xu, L.; Ren, W.; Zhao, D.; Zhu, Y.; Wu, X. Bioactive metabolites from *Chaetomium globosum* L18, an endophytic fungus in the medicinal plant *Curcuma wenyujin*. *Phytomedicine* **2012**, *19*, 364-368, doi:10.1016/j.phymed.2011.10.011.
6. Sun, W.; Wang, A.; Xu, D.; Wang, W.; Meng, J.; Dai, J.; Liu, Y.; Lai, D.; Zhou, L. New ustilaginoidins from rice false smut balls caused by *Villosiclava virens* and their phytotoxic and cytotoxic activities. *J. Agric. Food Chem.* **2017**, *65*, 5151-5160, doi:10.1021/acs.jafc.7b01791.
7. El-Elmat, T.; Figueroa, M.; Ehrmann, B.M.; Cech, N.B.; Pearce, C.J.; Oberlies, N.H. High-resolution MS, MS/MS, and UV database of fungal secondary metabolites as a dereplication protocol for bioactive natural products. *J. Nat. Prod.* **2013**, *76*, 1709-1716, doi:10.1021/np4004307.
8. Heald, S.L.; Jeffs, P.W.; Wheat, R.W. The identification of ergosterol and  $\Delta^9(11)$ -dehydroergosterol from mycelia of *Coccidioides immitis* by reverse-phase high-performance liquid and gas chromatography and ultraviolet and mass spectrometry. *Exp. Mycol.* **1981**, *5*, 162-166, doi:10.1016/0147-5975(81)90017-7.
9. Liu, H.; Zhao, X.; Guo, M.; Liu, H.; Zheng, Z. Growth and metabolism of *Beauveria bassiana* spores and mycelia. *BMC Microbiol.* **2015**, *15*, 1-12, doi:10.1186/s12866-015-0592-4.
